# Supplementary material for: Author Correction: A Cu(II)–ATP complex efficiently catalyses enantioselective Diels–Alder reactions
Source: PubMed Central journal article supplement (PMC8941126; doi:10.1038/s41467-022-28850-3), 2022-03-22
Supplement: 41467_2022_28850_MOESM1_ESM.pdf [file 41467_2022_28850_MOESM1_ESM.pdf]

Supplementary Information

**A Cu(II)-ATP complex efficiently catalyses enantioselective Diels-Alder reactions**

Wang *et al.*

## Supplementary Tables

**Supplementary Table 1 Enantioselective Diels-Alder reaction catalyzed by Cu<sup>2+</sup>-ATP with different copper(II) salts.<sup>a</sup>**

| Entry | Cofactor                          | Conversion (%) | <i>Endo/exo</i> | ee ( <b>3a</b> %, <i>exo</i> ) | ee ( <b>3a</b> %, <i>endo</i> ) |
|-------|-----------------------------------|----------------|-----------------|--------------------------------|---------------------------------|
| 1     | Cu(OTf) <sub>2</sub>              | 98             | 91:9            | 79                             | 72                              |
| 2     | CuSO <sub>4</sub>                 | 95             | 90:10           | 77                             | 67                              |
| 3     | CuCl <sub>2</sub>                 | 98             | 91:9            | 74                             | 62                              |
| 4     | Cu(NO <sub>3</sub> ) <sub>2</sub> | 90             | 91:9            | 74                             | 65                              |

<sup>a</sup> Reaction conditions: **1a** (1 mM), **2** (200 mM), ATP (250 μM), Cu(II) salt (50 μM), MES buffer (20 mM, pH 5.5), 4 °C, 24 h.

**Supplementary Table 2 Enantioselective Diels-Alder reaction catalyzed by Cu<sup>2+</sup>-ATP with different molar ratios.<sup>a</sup>**

| Entry | ATP (μM) | Cu(OTf) <sub>2</sub> (μM) | Conversion (%) | <i>Endo/exo</i> | ee ( <b>3a</b> %, <i>endo</i> ) |
|-------|----------|---------------------------|----------------|-----------------|---------------------------------|
| 1     | 500      | 50                        | 92             | 91:9            | 66                              |
| 2     | 250      | 50                        | 98             | 91:9            | 72                              |
| 3     | 100      | 50                        | 67             | 91:9            | 57                              |
| 4     | 50       | 50                        | 63             | 91:9            | 46                              |
| 5     | 25       | 50                        | 83             | 91:9            | 20                              |
| 6     | 10       | 50                        | 78             | 91:9            | 7                               |
| 7     | 5        | 50                        | 73             | 92:8            | 1                               |
| 8     | 250      | 25                        | 72             | 89:11           | 66                              |
| 9     | 250      | 50                        | 98             | 91:9            | 72                              |
| 10    | 250      | 125                       | 79             | 91:9            | 62                              |
| 11    | 250      | 250                       | 67             | 91:9            | 52                              |
| 12    | 250      | 500                       | 88             | 92:8            | 46                              |

<sup>a</sup> Reaction conditions: **1a** (1 mM), **2** (200 mM), ATP (5-500 μM), Cu(OTf)<sub>2</sub> (25-500 μM), MES buffer (20 mM, pH 5.5), 4 °C, 24 h.

**Supplementary Table 3 Enantioselective Diels-Alder reaction catalyzed by Cu<sup>2+</sup>-ATP with different additives.<sup>a</sup>**

| Entry | Additive           | Concentration (mM) | Conversion (%) | <i>Endo/exo</i> | ee ( <b>3a</b> %, <i>endo</i> ) |
|-------|--------------------|--------------------|----------------|-----------------|---------------------------------|
| 1     | none               | none               | 98             | 91:9            | 72                              |
| 2     | NaCl               | 10                 | 74             | 90:10           | 65                              |
| 3     | KCl                | 10                 | 87             | 90:10           | 67                              |
| 4     | NH <sub>4</sub> Cl | 10                 | 75             | 90:10           | 65                              |
| 5     | MgCl <sub>2</sub>  | 10                 | 90             | 91:9            | 53                              |
| 6     | MgCl <sub>2</sub>  | 50                 | 67             | 91:9            | 42                              |
| 7     | MgCl <sub>2</sub>  | 100                | 92             | 90:10           | 31                              |
| 8     | MgCl <sub>2</sub>  | 250                | 94             | 93:7            | 18                              |
| 9     | MgCl <sub>2</sub>  | 500                | 85             | 93:7            | 4                               |
| 10    | MgCl <sub>2</sub>  | 1000               | 87             | 93:7            | 0                               |

<sup>a</sup> Reaction conditions: **1a** (1 mM), **2** (200 mM), additive, ATP (250 μM), Cu(OTf)<sub>2</sub> (50 μM), MES buffer (20 mM, pH 5.5), 4 °C, 24 h.

**Supplementary Table 4 Enantioselective Diels-Alder reaction catalyzed by Cu<sup>2+</sup>-ATP at different temperatures.<sup>a</sup>**

| Entry | <i>T</i> (°C) | Conversion (%) | <i>Endo/exo</i> | ee ( <b>3a</b> %, <i>endo</i> ) |
|-------|---------------|----------------|-----------------|---------------------------------|
| 1     | 0             | 87             | 91:9            | 66                              |
| 2     | 4             | 98             | 91:9            | 72                              |
| 3     | 15            | 98             | 90:10           | 62                              |
| 4     | 25            | 96             | 91:9            | 56                              |
| 5     | 37            | 71             | 89:11           | 44                              |

<sup>a</sup> Reaction conditions: **1a** (1 mM), **2** (200 mM), ATP (250 μM), Cu(OTf)<sub>2</sub> (50 μM), MES buffer (20 mM, pH 5.5), 24 h.

**Supplementary Table 5 Enantioselective Diels-Alder reaction catalyzed by Cu<sup>2+</sup>-ATP in different buffers.<sup>a</sup>**

| Entry | Buffer   | pH  | Conversion (%) | <i>Endo/exo</i> | ee ( <b>3a</b> %, <i>endo</i> ) |
|-------|----------|-----|----------------|-----------------|---------------------------------|
| 1     | MES      | 5.0 | 80             | 90:10           | 63                              |
| 2     | MES      | 5.5 | 98             | 91:9            | 72                              |
| 3     | MES      | 6.0 | 90             | 90:10           | 65                              |
| 4     | MES      | 6.5 | 74             | 90:10           | 64                              |
| 5     | MOPS     | 6.5 | 93             | 89:11           | 69                              |
| 6     | MOPS     | 7.0 | 89             | 89:11           | 67                              |
| 7     | MOPS     | 7.4 | 87             | 88:12           | 69                              |
| 8     | Tris-HCl | 7.4 | 27             | 86:14           | 55                              |
| 9     | PBS      | 7.4 | 63             | 89:11           | 65                              |

<sup>a</sup> Reaction conditions: **1a** (1 mM), **2** (200 mM), ATP (250 μM), Cu(OTf)<sub>2</sub> (50 μM), buffer (20 mM), 4 °C, 24 h.

**Supplementary Table 6 Comparable catalytic performances of enantioselective Diels-Alder reactions catalyzed by various metallo-biohybrid catalysts.**

| Reference | Publication year | Biological scaffold           | Metal species                                                                       | Conversion (%) | Endo/exo | ee (endo, %)   |
|-----------|------------------|-------------------------------|-------------------------------------------------------------------------------------|----------------|----------|----------------|
| This work | Not yet          | ATP                           | Cu(OTf) <sub>2</sub>                                                                | 85             | 84:16    | 84             |
| 1         | 1998             | L-abrine                      | Cu(NO <sub>3</sub> ) <sub>2</sub>                                                   | >90            | >90:10   | 74             |
| 2         | 2000             | Ribozyme                      | NaCl and MgCl <sub>2</sub>                                                          | Not mentioned  | 95:5     | 95             |
| 3         | 2005             | Double-stranded DNA           | Cu(NO <sub>3</sub> ) <sub>2</sub> and 9-aminoacridine derivative                    | >80            | 91:9     | 53             |
| 4         | 2006             | Double-stranded DNA           | Cu(NO <sub>3</sub> ) <sub>2</sub> and 4,4'-dimethyl-2,2'-bipyridine                 | >80            | 99:1     | 99             |
| 5         | 2006             | Bovine serum albumin          | Copper phthalocyanine-3,4',4'',4'''-tetrasulfonic acid tetrasodium salt             | 91             | 91:9     | 98             |
| 6         | 2009             | Bovine pancreatic polypeptide | Cu(NO <sub>3</sub> ) <sub>2</sub>                                                   | 73             | >95:5    | 83             |
| 7         | 2010             | tHisF                         | CuSO <sub>4</sub>                                                                   | 73             | 93:7     | 46             |
| 8         | 2010             | G-quadruplex DNA              | Cu(NO <sub>3</sub> ) <sub>2</sub> and 4,4'-dimethyl-2,2'-bipyridine                 | >85            | 95:5     | 34             |
| 9         | 2012             | G-quadruplex DNA              | Cu(NO <sub>3</sub> ) <sub>2</sub>                                                   | 99             | 98:2     | 74             |
| 10        | 2012             | LmrR_M89C-Phen                | Cu(NO <sub>3</sub> ) <sub>2</sub>                                                   | 93             | 95:5     | 97             |
| 11        | 2013             | SCP-2LV83C                    | Cu(NO <sub>3</sub> ) <sub>2</sub> and phenanthroline derivative                     | 20             | 88:22    | 25             |
| 12        | 2013             | G-quadruplex DNA              | 5,10,15,20-Tetrakis(1-methylpyridinium-4-yl)porphyrinatocopper(II) tetraperchlorate | 94             | 97:3     | 69             |
| 13        | 2014             | Cyclic peptides               | Cu(NO <sub>3</sub> ) <sub>2</sub>                                                   | 85             | 96:4     | 96             |
| 14        | 2015             | Cucurbit[8]uril               | Cu(NO <sub>3</sub> ) <sub>2</sub>                                                   | 99             | 97:3     | 92             |
| 15        | 2015             | Lipase                        | Cu(NO <sub>3</sub> ) <sub>2</sub> and phenanthroline derivative                     | 98             | 94:6     | 92             |
| 16        | 2015             | G-quadruplex DNA              | Cu(NO <sub>3</sub> ) <sub>2</sub> and terpyridine                                   | >99            | 98:2     | 99             |
| 17        | 2016             | β-Barrel protein nitrobindin  | Cu(II) terpyridyl complexes                                                         | 22             | 90:10    | Not determined |
| 18        | 2016             | FhuA-terpyridyl               | Cu(NO <sub>3</sub> ) <sub>2</sub>                                                   | 69             | 96:4     | 0              |
| 19        | 2016             | Neocarzinostatin              | Cu(NO <sub>3</sub> ) <sub>2</sub> and phenanthroline derivative                     | 98             | 84:16    | 0              |
| 20        | 2016             | G-triplex DNA                 | Cu(NO <sub>3</sub> ) <sub>2</sub>                                                   | 99             | 99:1     | 64             |
| 21        | 2017             | DNA hairpins                  | Cu(NO <sub>3</sub> ) <sub>2</sub> and 4,4'-dimethyl-2,2'-bipyridine                 | 99             | 99:1     | 96             |
| 22        | 2017             | β-Barrel protein nitrobindin  | Cu(NO <sub>3</sub> ) <sub>2</sub>                                                   | 56             | 95:5     | 69             |
| 23        | 2017             | αRep A3                       | Cu(NO <sub>3</sub> ) <sub>2</sub> and phenanthroline derivative                     | 11             | 86:14    | 62             |
| 24        | 2017             | Double-stranded RNA           | Cu(NO <sub>3</sub> ) <sub>2</sub> and 4,4'-dimethyl-2,2'-bipyridine                 | 11             | 91:9     | 10             |
| 25        | 2018             | HEK-A <sub>24</sub>           | Cu(NO <sub>3</sub> ) <sub>2</sub> and phenanthroline derivative                     | 22             | 80:20    | 28             |
| 26        | 2019             | mTFP                          | Cu(NO <sub>3</sub> ) <sub>2</sub>                                                   | 97             | 93:7     | 26             |
| 27        | 2019             | αRep (A3_A3')F119C            | Terpy-Cu(NO <sub>3</sub> ) <sub>2</sub>                                             | 15             | 93:7     | 52             |
| 28        | 2019             | ACCO                          | Cu(NO <sub>3</sub> ) <sub>2</sub>                                                   | 100            | 99:1     | >99            |
| 29        | 2020             | c-di-AMP                      | Cu(OTf) <sub>2</sub>                                                                | 99             | 97:3     | 80             |

## Supplementary Figures

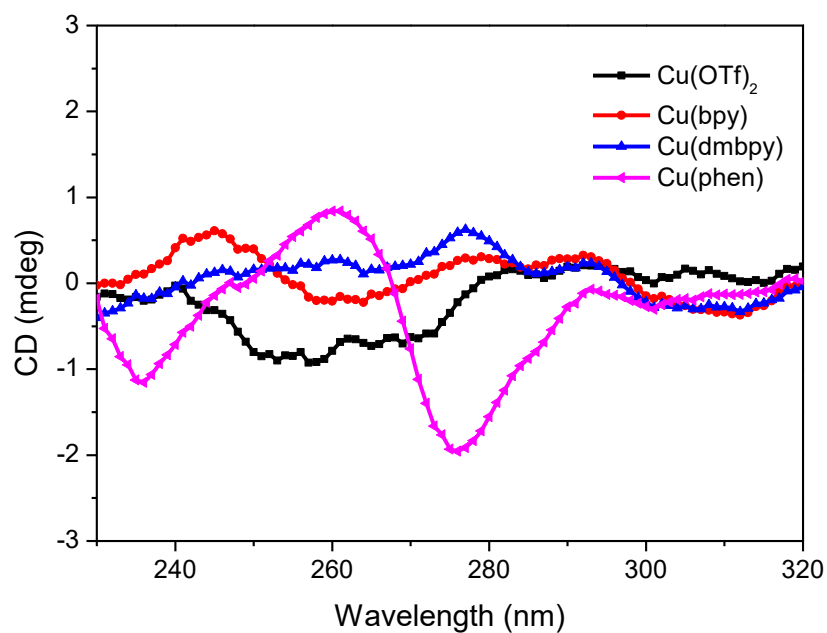

**Supplementary Fig. 1** CD spectra of ATP (250 μM) with different copper(II) cofactors (50 μM) in MES buffer (20 mM, pH 5.5).

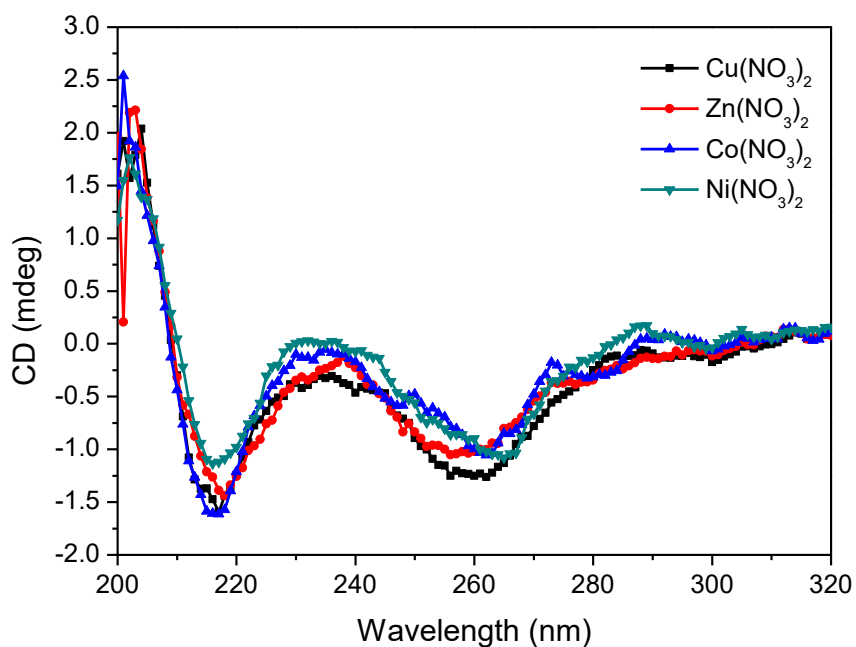

**Supplementary Fig. 2** CD spectra of ATP (250 μM) with different divalent metal salts (50 μM) in MES buffer (20 mM, pH 5.5).

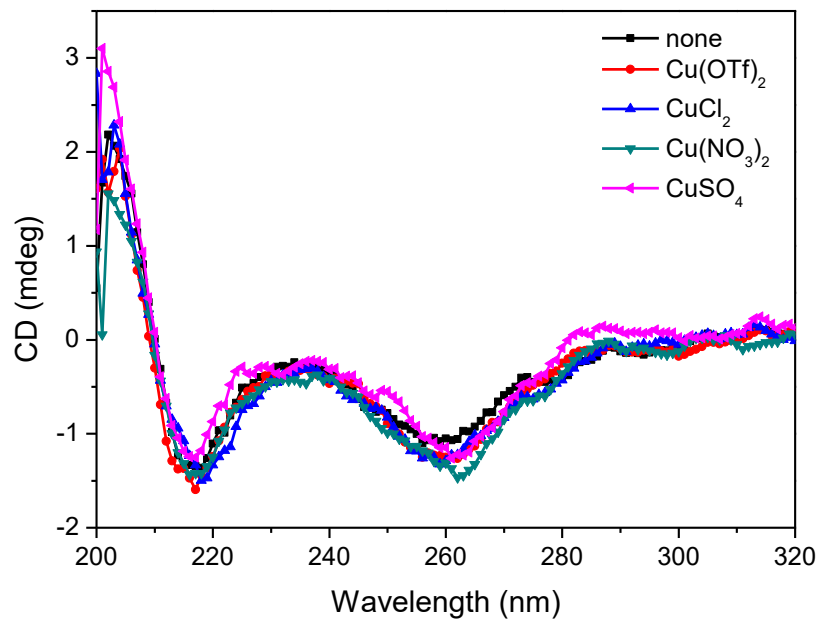

**Supplementary Fig. 3** CD spectra of ATP (250  $\mu\text{M}$ ) with different copper(II) salts (50  $\mu\text{M}$ ) in MES buffer (20 mM, pH 5.5).

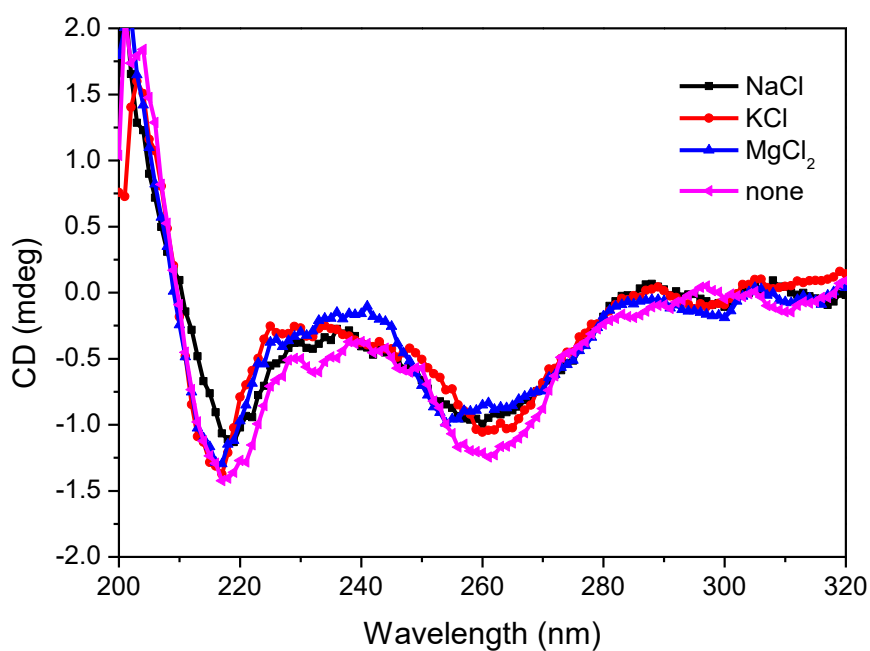

**Supplementary Fig. 4** CD spectra of ATP (250  $\mu\text{M}$ ) and  $\text{Cu}(\text{OTf})_2$  (50  $\mu\text{M}$ ) in the presence of different additive ions (10 mM) in MES buffer (20 mM, pH 5.5).

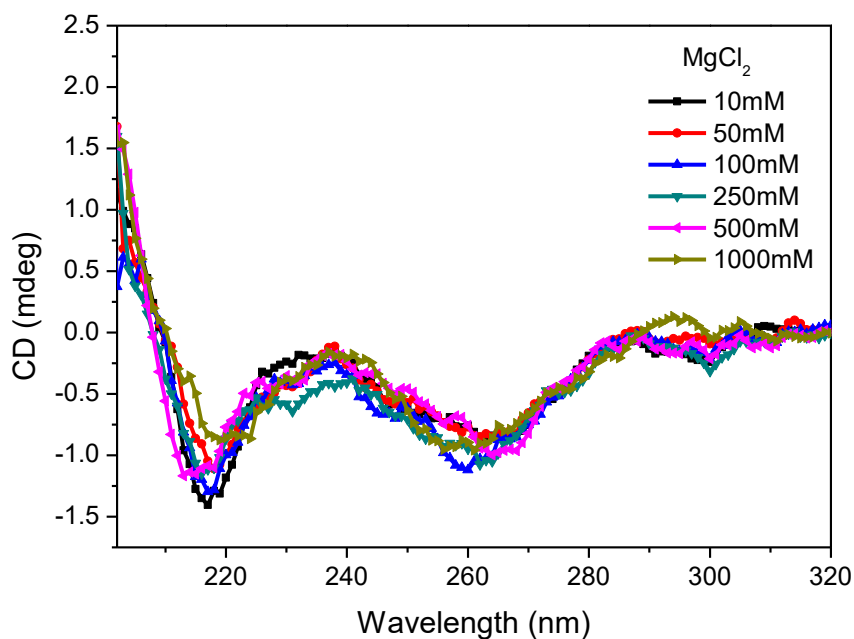

**Supplementary Fig. 5** CD spectra of ATP (250  $\mu\text{M}$ ) and  $\text{Cu}(\text{OTf})_2$  (50  $\mu\text{M}$ ) with different concentration of  $\text{MgCl}_2$  (10-1000 mM) in MES buffer (20 mM, pH 5.5).

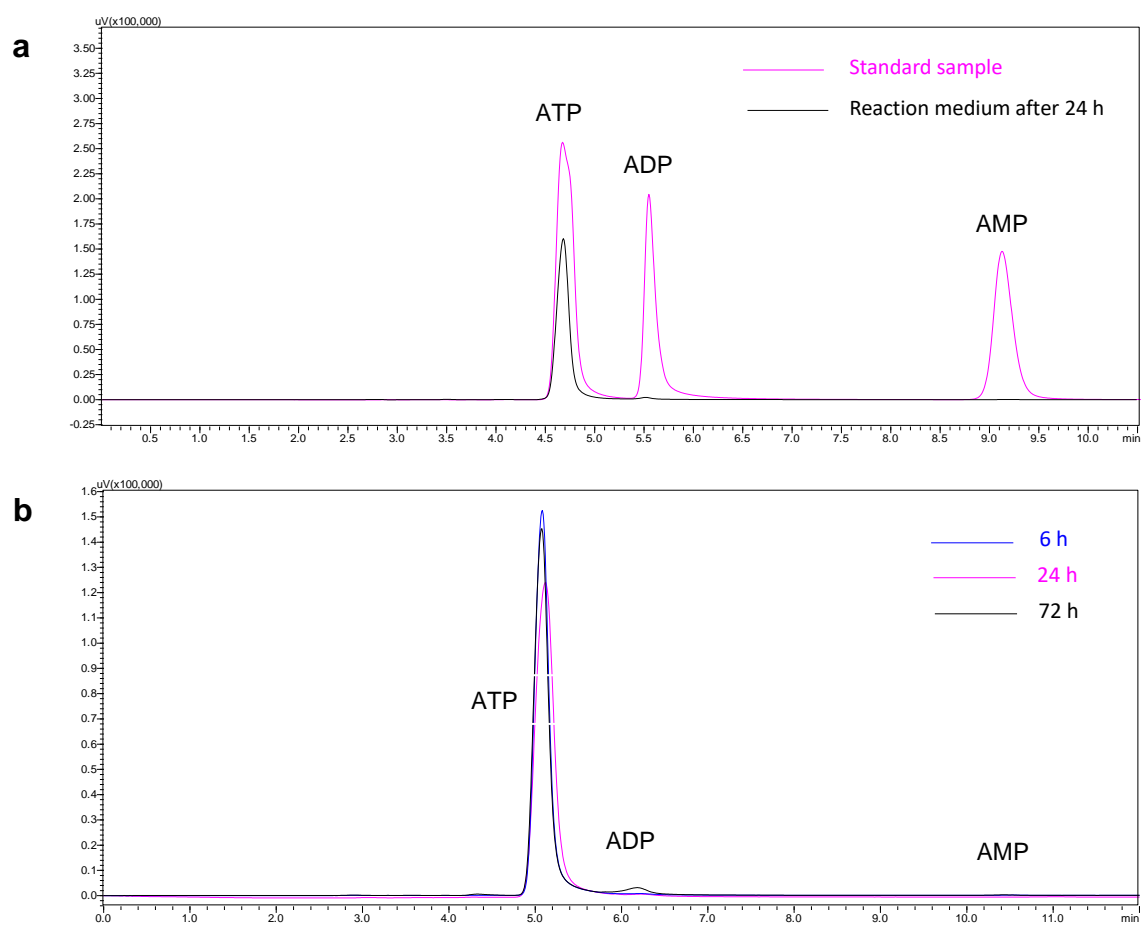

**Supplementary Fig. 6 a** HPLC analysis of the reaction medium of  $\text{Cu}^{2+}$ -ATP-catalyzed Diels-Alder reaction. Reaction conditions: **1a** (1 mM), **2** (200 mM), ATP (250  $\mu\text{M}$ ),  $\text{Cu}(\text{OTf})_2$  (50  $\mu\text{M}$ ), MES buffer (20 mM, pH 5.5), 4  $^\circ\text{C}$ . **b** The stability of ATP in MES buffer (20 mM, pH 5.5) at different reaction time points.



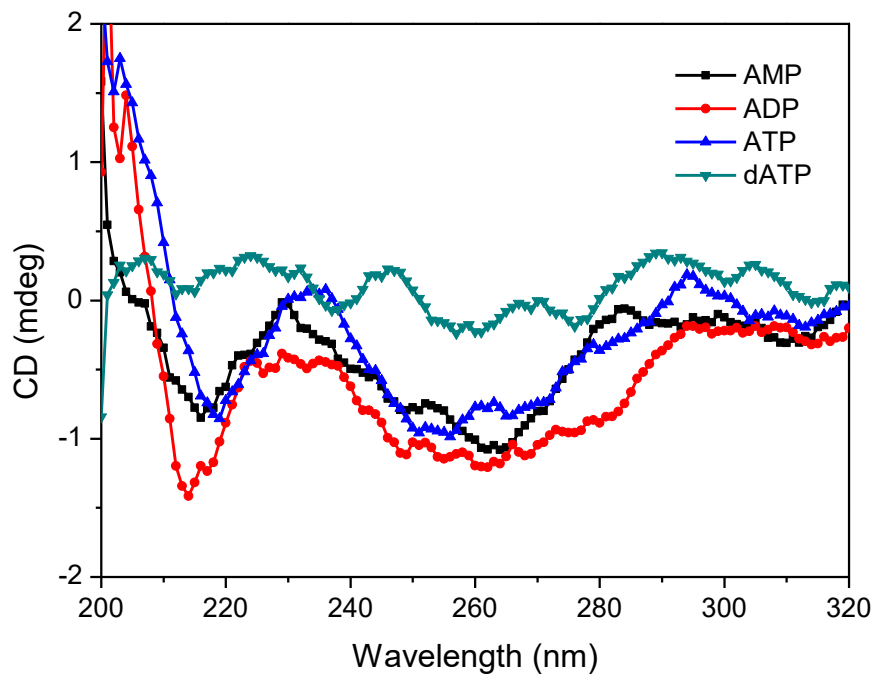

**Supplementary Fig. 7** CD spectra of different ATP analogues (250  $\mu\text{M}$ ) with  $\text{Cu}(\text{OTf})_2$  (50  $\mu\text{M}$ ) in MES buffer (20 mM, pH 5.5).

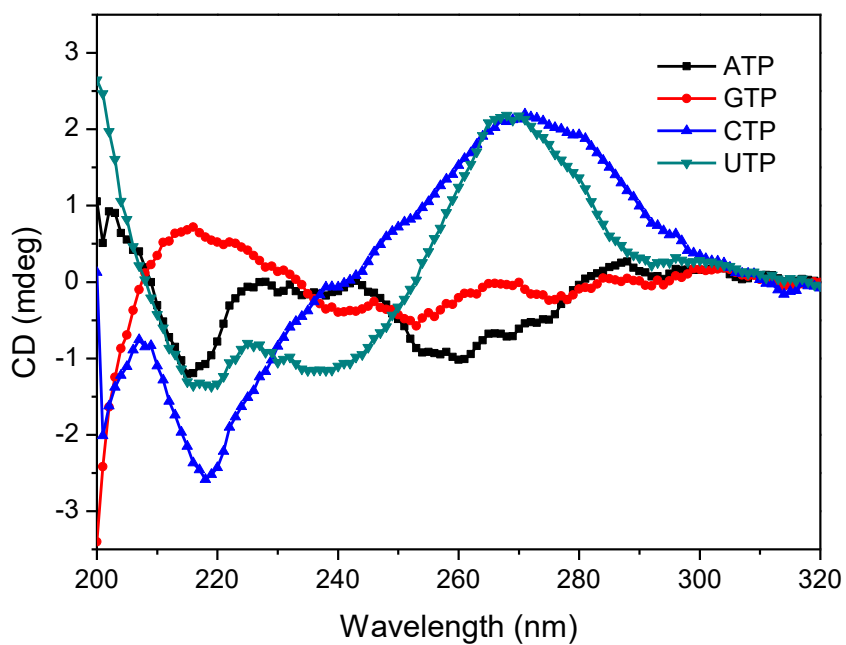

**Supplementary Fig. 8** CD spectra of different NTPs (250  $\mu\text{M}$ ) with  $\text{Cu}(\text{OTf})_2$  (50  $\mu\text{M}$ ) in MES buffer (20 mM, pH 5.5).

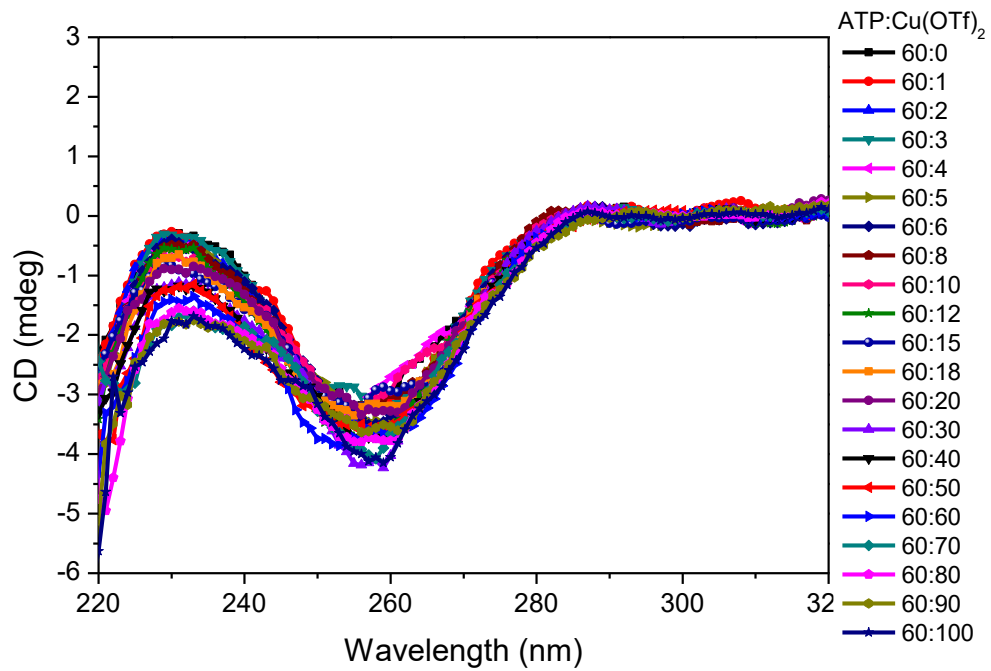

**Supplementary Fig. 9** CD spectra of ATP (60  $\mu\text{M}$ ) with different amounts of  $\text{Cu}(\text{OTf})_2$  (0-100  $\mu\text{M}$ ) in MES buffer (20 mM, pH 5.5).

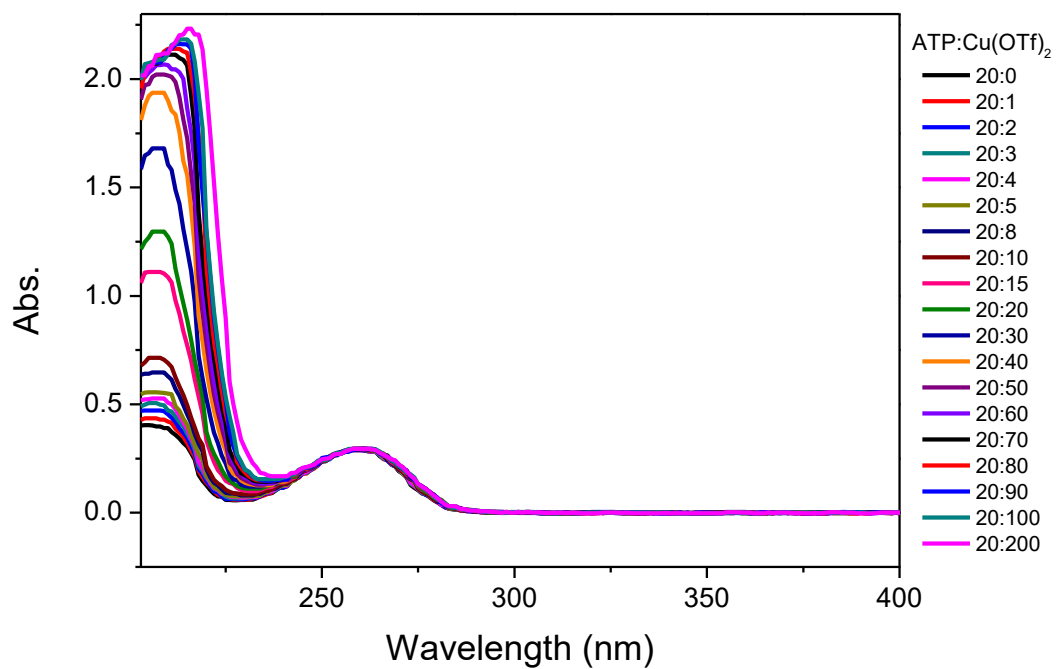

**Supplementary Fig. 10** UV-Vis spectra of ATP (20  $\mu\text{M}$ ) with different amounts of  $\text{Cu}(\text{OTf})_2$  (0-200  $\mu\text{M}$ ) in MES buffer (20 mM, pH 5.5).

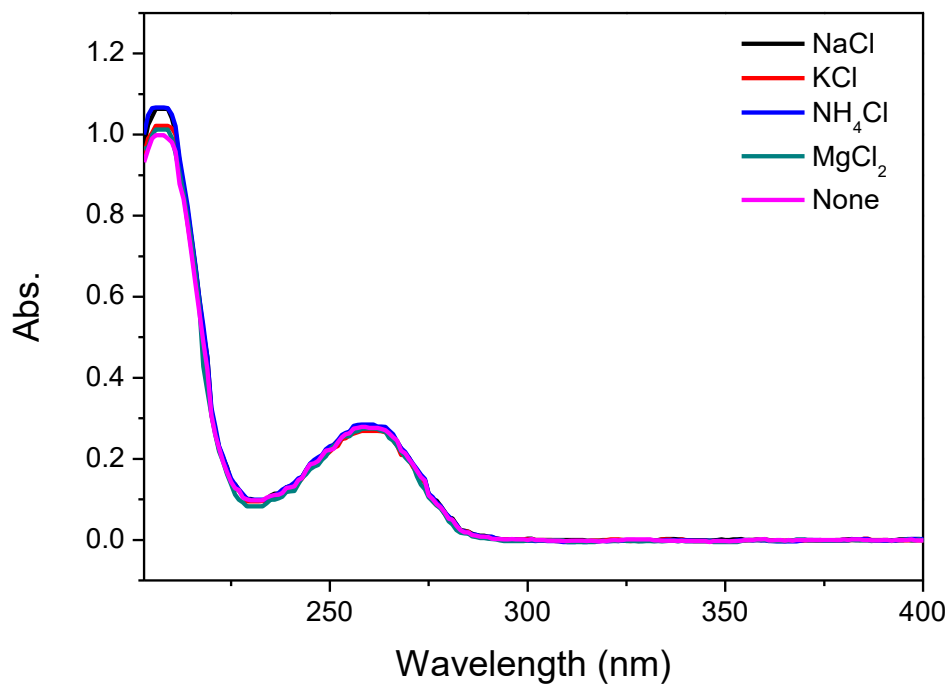

**Supplementary Fig. 11** UV-Vis spectra of ATP (20  $\mu\text{M}$ ) and  $\text{Cu}(\text{OTf})_2$  (20  $\mu\text{M}$ ) in the presence of different additives (1 mM) in MES buffer (20 mM, pH 5.5).

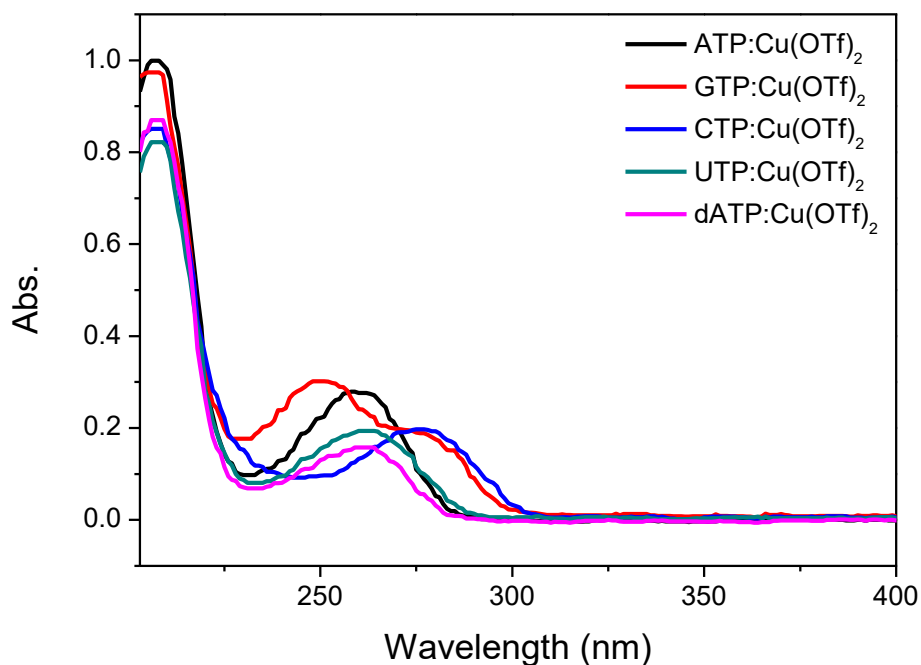

**Supplementary Fig. 12** UV-Vis spectra of different NTPs (20  $\mu\text{M}$ ) with  $\text{Cu}(\text{OTf})_2$  (20  $\mu\text{M}$ ) in MES buffer (20mM, pH 5.5).

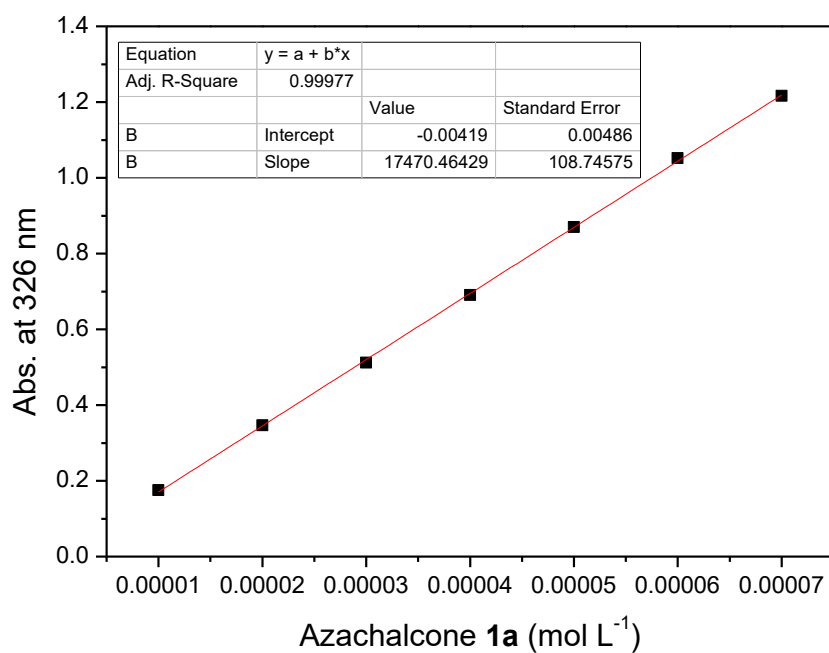

**Supplementary Fig. 13** Determination of the molar extinction coefficient of **1a**. The absorbance of **1a** at 326 nm was determined with the fixed concentration of **1a** of 10, 20, 30, 40, 50, 60 and 70  $\mu\text{M}$ . The molar extinction coefficient of **1a** ( $\epsilon_{1a} = 17470 \text{ M}^{-1} \text{ cm}^{-1}$ ) was estimated from the slope of the fitting curve ( $R^2 = 0.999$ ).

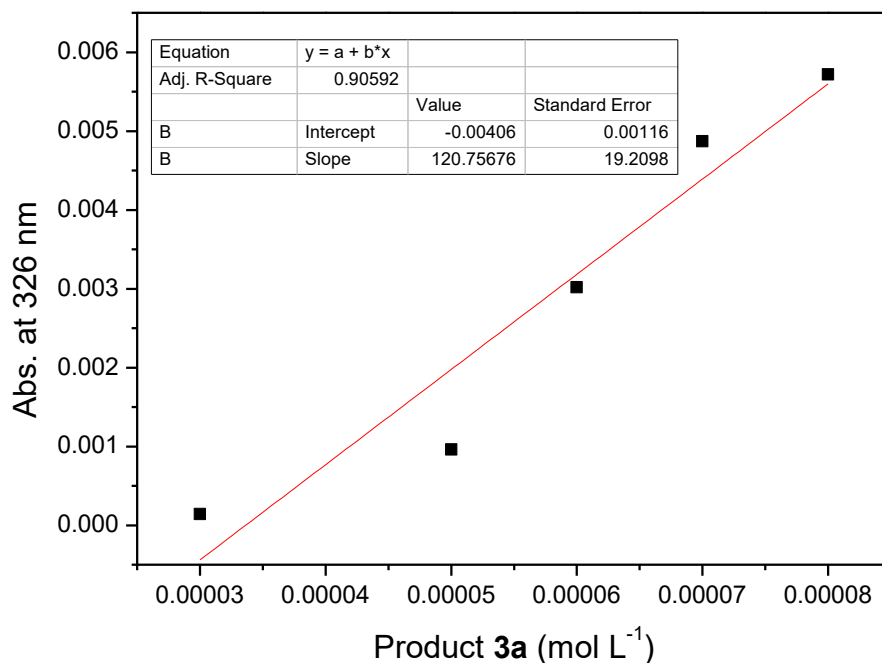

**Supplementary Fig. 14** Determination of the molar extinction coefficient of **3a**. The absorbance of **3a** at 326 nm was determined with the fixed concentration of **3a** at 30, 50, 60, 70 and 80  $\mu\text{M}$ . The molar extinction coefficient of **3a** ( $\epsilon_{3a} = 121 \text{ M}^{-1} \text{ cm}^{-1}$ ) was estimated from the slope of the fitting curve ( $R^2 = 0.906$ ).

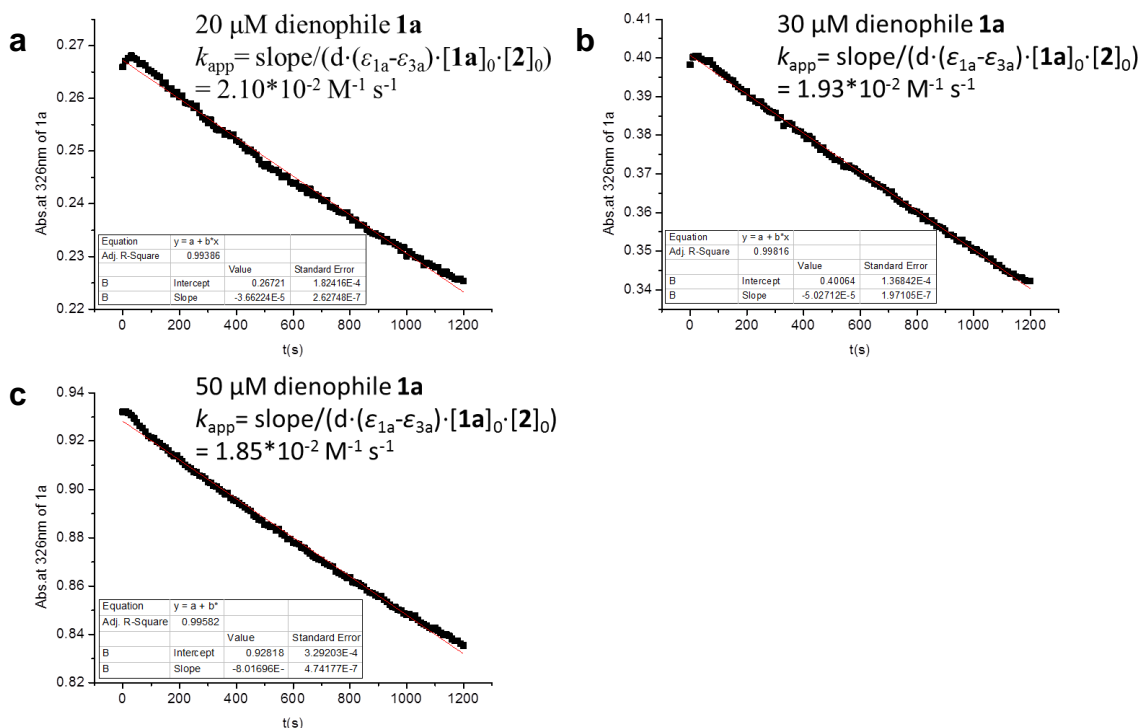

**Supplementary Fig. 15** Kinetic plots of  $\text{Cu}^{2+}$ -ATP catalyzed D-A reactions with dienophile **1a** at the concentrations of **a** 20  $\mu\text{M}$ , **b** 30  $\mu\text{M}$ , and **c** 50  $\mu\text{M}$ . Reaction conditions: **1a** (20, 30, 50  $\mu\text{M}$ ), **2** (5 mM), ATP (250  $\mu\text{M}$ ),  $\text{Cu}(\text{OTf})_2$  (50  $\mu\text{M}$ ), MES buffer (2000  $\mu\text{L}$ , 20 mM, pH 5.5), 4  $^\circ\text{C}$ .

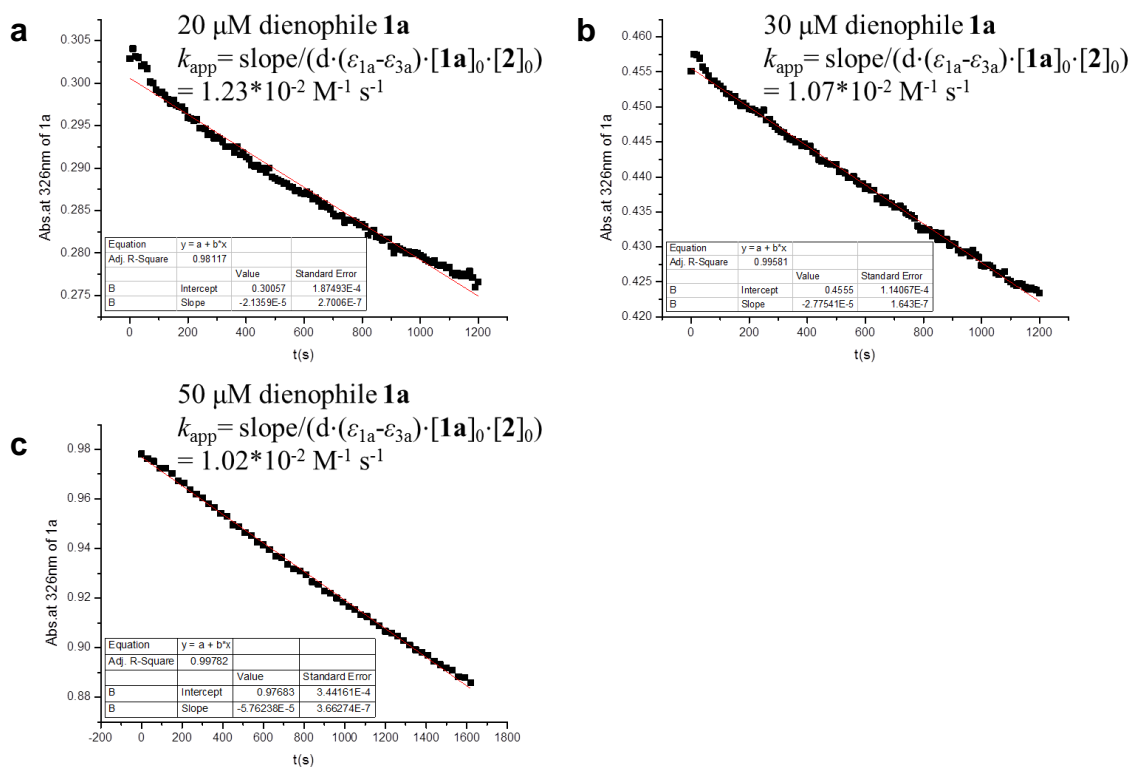

**Supplementary Fig. 16** Kinetic plots of  $\text{Cu}(\text{OTf})_2$  catalyzed D-A reactions with dienophile **1a** at the concentrations of **a** 20  $\mu\text{M}$ , **b** 30  $\mu\text{M}$ , and **c** 50  $\mu\text{M}$ . Reaction conditions: **1a** (20, 30, 50  $\mu\text{M}$ ), **2** (5 mM),  $\text{Cu}(\text{OTf})_2$  (50  $\mu\text{M}$ ), MES buffer (2000  $\mu\text{L}$ , 20 mM, pH 5.5), 4  $^\circ\text{C}$ .

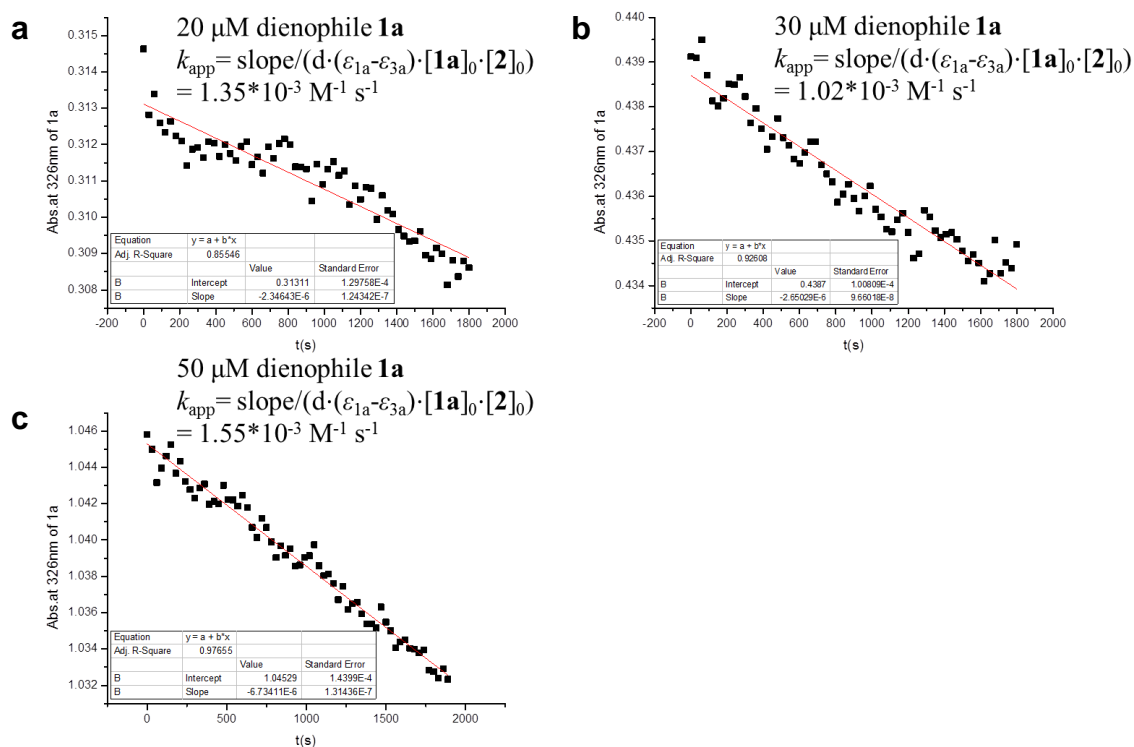

**Supplementary Fig. 17** Kinetic plots of ATP catalyzed D-A reactions with dienophile **1a** at the concentrations of **a** 20  $\mu\text{M}$ , **b** 30  $\mu\text{M}$ , and **c** 50  $\mu\text{M}$ . Reaction conditions: **1a** (20, 30, 50  $\mu\text{M}$ ), **2** (5 mM), ATP (250  $\mu\text{M}$ ), MES buffer (2000  $\mu\text{L}$ , 20 mM, pH 5.5), 4  $^{\circ}\text{C}$ .

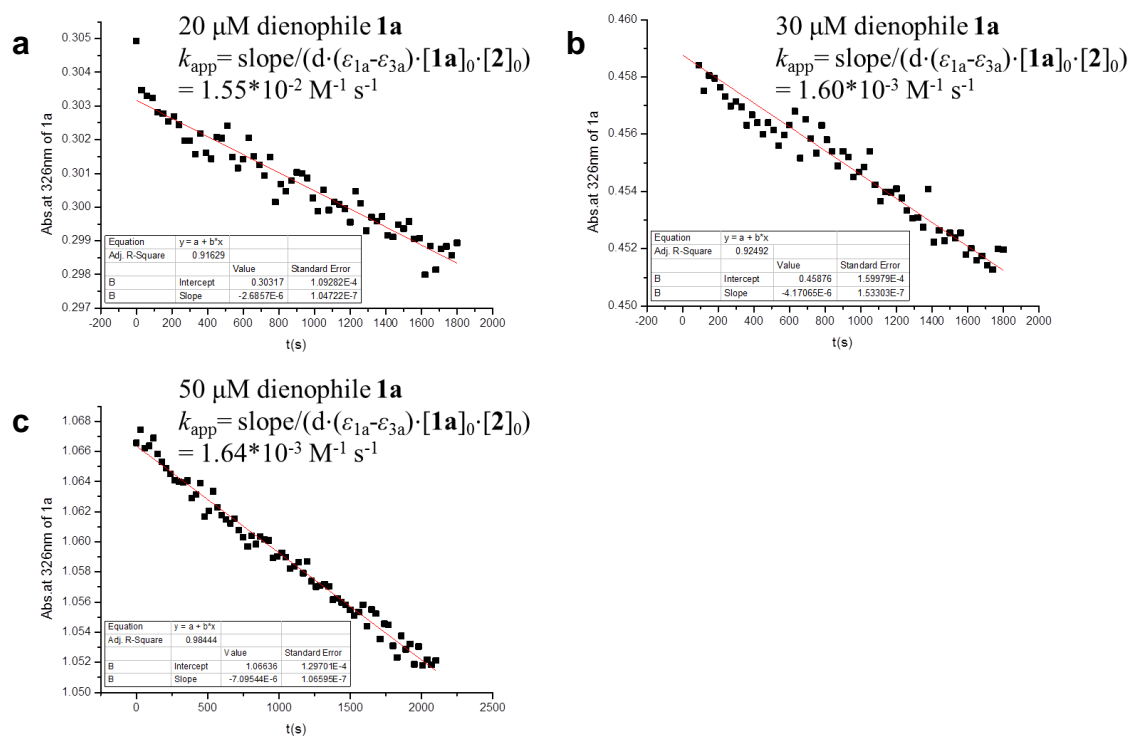

**Supplementary Fig. 18** Kinetic plots of the D-A reactions in the absence of catalysts with dienophile **1a** at the concentrations of **a** 20  $\mu\text{M}$ , **b** 30  $\mu\text{M}$ , and **c** 50  $\mu\text{M}$ . Reaction conditions: **1a** (20, 30, 50  $\mu\text{M}$ ), **2** (5 mM), MES buffer (2000  $\mu\text{L}$ , 20 mM, pH 5.5), 4  $^{\circ}\text{C}$ .

## Supplementary Methods

**General materials.** ATP, GTP, UTP, CTP, dATP, ADP, AMP and adenosine were purchased from Sangon (Shanghai, China). The metal salts, achiral ligands and buffers were purchased from Energy Chemical and J&K Scientific Ltd. The chemicals were used without further purification unless otherwise stated. Water used was distilled and deionized using a Milli-Q A10 water purification system. Azachalcones (**1a-h**) and the racemates (**3a-h**) were prepared followed the literature.<sup>30</sup>

Circular dichroism (CD) spectra were measured on a Chirascan circular dichroism spectrometer (Applied Photophysics Ltd, UK). The CD spectra were performed using a quartz cell (1 mm optical path length), an instrument scanning speed of 100 nm min<sup>-1</sup> and were accumulated by taking the average of three scans made from 200 to 320 nm at 4 °C. UV/Vis spectra were measured on Agilent Cary 3500 or Mettler-Toledo UV5Bio spectrophotometer in a sealed quartz cell with a path length of 1.0 cm. NMR titration spectra (<sup>1</sup>H, <sup>31</sup>P NMR) of ATP with varied concentration of CuCl<sub>2</sub> were performed on a Bruker AV 600 MHz spectrometer. To a solution of ATP (120 mM) in D<sub>2</sub>O in a nuclear magnetic tube, a stock solution of CuCl<sub>2</sub> in D<sub>2</sub>O was gradually added to vary the ratio of ATP/Cu<sup>2+</sup> from 1000:1 to 5:1. <sup>1</sup>H NMR spectra and <sup>31</sup>P NMR spectra were collected at each molar ratio of ATP/Cu<sup>2+</sup>. Electron paramagnetic resonance (EPR) experiments were conducted on a Bruker EMX plus 10/12 CW X-band EPR spectrometer under a microwave frequency of 9.43 GHz equipped with a liquid nitrogen cooling system. The EPR spectra were measured at 100 K with a modulation amplitude of 0.3 mT, a modulation frequency of 100 kHz, and a microwave power of 20 mW. A mixture of ATP (final conc. 50 mM) and Cu(OTf)<sub>2</sub> (final conc. 10 mM) was added to a MES buffer (20 mM, pH 5.5) with glycerol (20 v/v%). After thoroughly mixed, the solution was drawn into a capillary tube and sealed followed by placing into an EPR tube. After cooling in liquid nitrogen for 5 min, the EPR spectra were started to collect.

**Determination of the apparent  $k_b$ .** The apparent binding constant ( $k_b$ ) of the Cu<sup>2+</sup>-ATP complex was estimated from the UV titration experiments adopted from the previous reference.<sup>31</sup> To a fixed concentration of Cu(OTf)<sub>2</sub> (5 μM) aqueous solution at room temperature, a stock solution of ATP in H<sub>2</sub>O was titrated to make the final concentration over the range from 0.1 μM to 100 μM. The apparent  $k_b$  for the Cu<sup>2+</sup>-ATP complex was calculated by the following Supplementary Equation 1:

$$[\text{ATP}]/\Delta\epsilon_a = [\text{ATP}]/\Delta\epsilon + 1/(\Delta\epsilon_a \cdot k_b) \quad (1)$$

where  $\Delta\epsilon_a = |\epsilon_{\text{app}} - \epsilon_f|$ ,  $\Delta\epsilon = |\epsilon_b - \epsilon_f|$ ,  $\epsilon_{\text{app}}$ ,  $\epsilon_f$  and  $\epsilon_b$  are the apparent, free and bound extinction coefficients for the complex, respectively. In a plot of  $[\text{ATP}]/\Delta\epsilon_a$  vs.  $[\text{ATP}]$ ,  $k_b$  is given by the ratio of the slope to the y intercept.

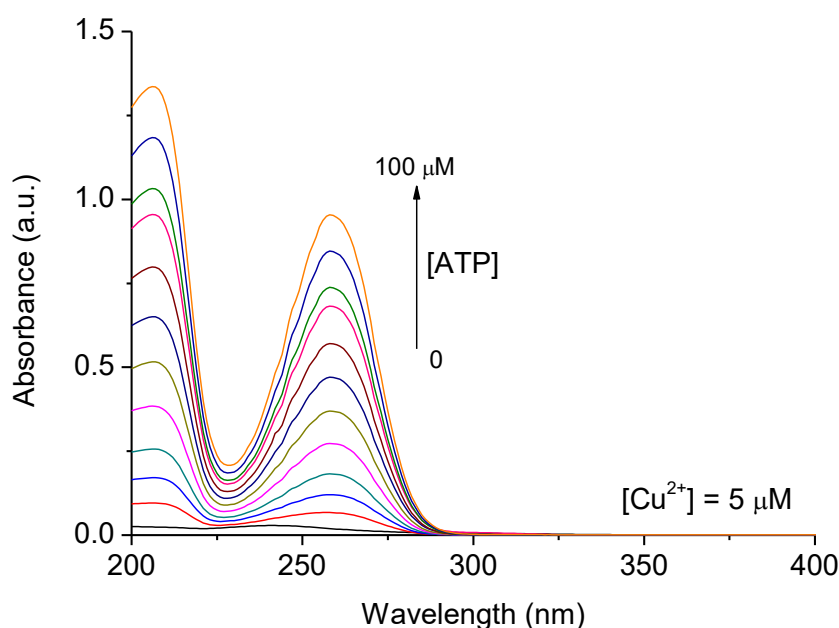

**Supplementary Fig. 19** UV titration of varied concentrations of ATP (0-100 μM) to a fixed concentration of Cu(OTf)<sub>2</sub> (5 μM) in H<sub>2</sub>O.

**Determination of the absolute configuration of 3a.** For the  $\text{Cu}^{2+}$ -ATP-catalyzed D-A reaction of **1a** and **2**, the absolute configurations of the product **3a** were determined in comparison with the reported literature.<sup>22</sup> Hayashi et al. reported that the enantioselective D-A reaction of **1a** and **2** was catalyzed by NB-Pyr and  $\text{Cu}(\text{II})$  ions, yielding the chiral product **3a** (*Si-endo*) at 78% ee in (1*R*,2*S*,3*S*,4*S*) configuration. The *endo* and *exo* isomers of **3a** were assigned on the HPLC trace using Chiralpak IA column (hexane/*i*-PrOH = 99.5:0.5, 0.5 mL min<sup>-1</sup>, 264 nm) with the order of the **3a** enantiomers of **3a** (*Re-exo*), **3a** (*Si-exo*), **3a** (*Si-endo*) and **3a** (*Re-endo*).<sup>22</sup> Using the same HPLC condition and Chiralpak IA column, we analyzed the product **3a** that was obtained from the Diels–Alder reaction of **1a** and **2** catalyzed by  $\text{Cu}^{2+}$ -ATP. The HPLC traces of **3a** in racemic form and chiral form are shown in Supplementary Fig. 21. By comparison to the reference, we determined that the major product **3a** generated by  $\text{Cu}^{2+}$ -ATP was **3a** (*Si-endo*) in (1*R*,2*S*,3*S*,4*S*) configuration.

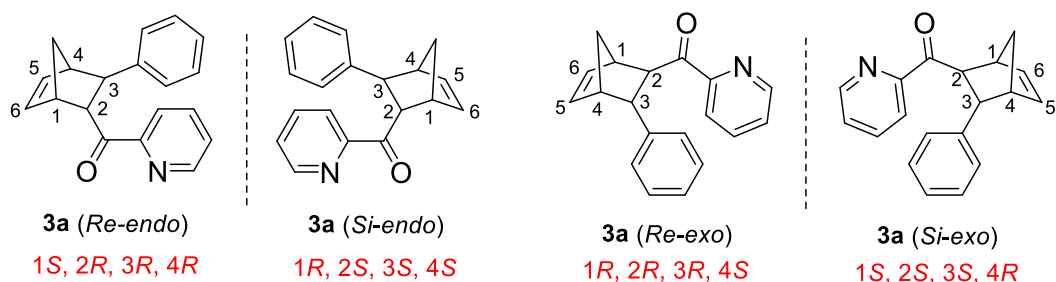

**Supplementary Fig. 20** The absolute configurations of the D-A product **3a** for the *endo* and *exo* isomers.

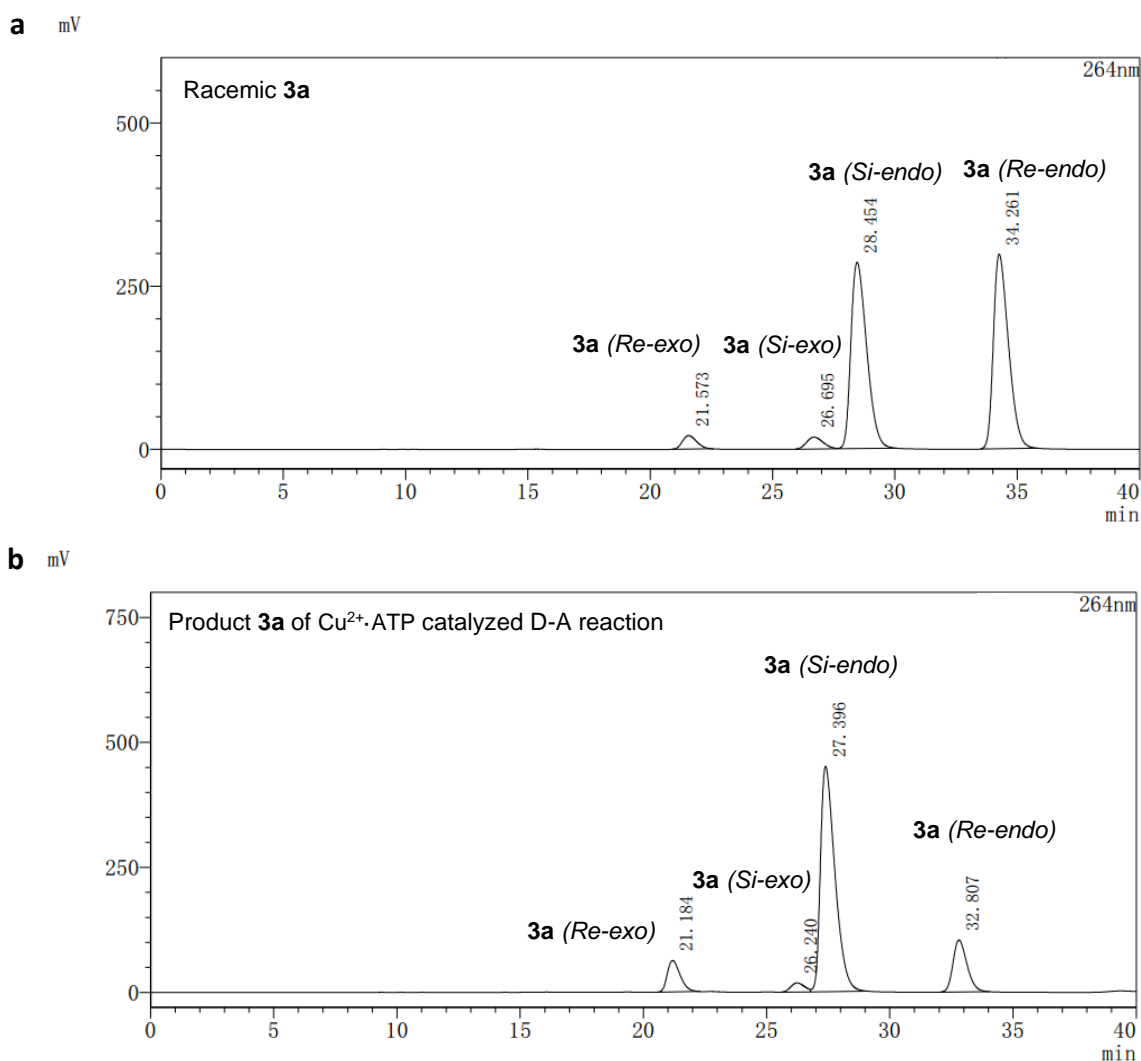

**Supplementary Fig. 21** HPLC traces of **a** racemic and **b** product of **3a** from the Diels-Alder reaction catalyzed by  $\text{Cu}^{2+}$ -ATP using Chiralpak IA column. The major product **3a** generated by  $\text{Cu}^{2+}$ -ATP is **3a** (*Si-endo*) in (1*R*,2*S*,3*S*,4*S*) configuration.



**DFT calculations.** In order to compare the stability among all candidates, the relative electronic energies were listed in Supplementary Figs. 22-25 in which the most stable configuration was set to zero.

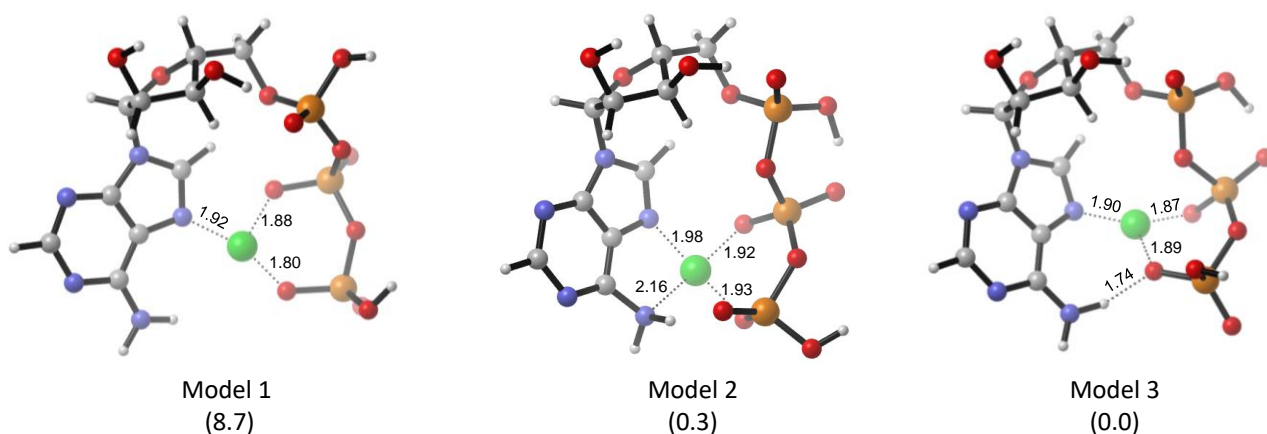

**Supplementary Fig. 22** The proposed models of  $\text{Cu}^{2+}$ -ATP. The relative electronic energies are in the levels of B3LYP-D3/6-311G(d,p)-LANL2DZ with a unit of  $\text{kcal mol}^{-1}$ .

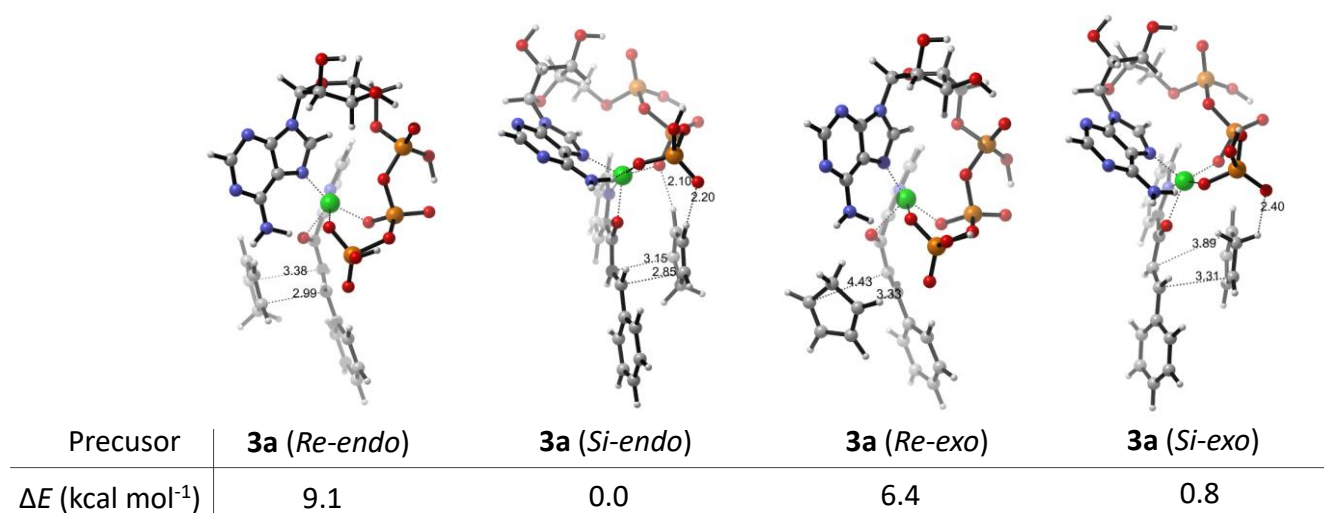

**Supplementary Fig. 23** The precursors of the intermediates of  $1\text{a-Cu}^{2+}$ -ATP and **2** that yield the corresponding products **3a** in different configurations. The relative electronic energies ( $\Delta E$ ) of the precursors are shown in the table.

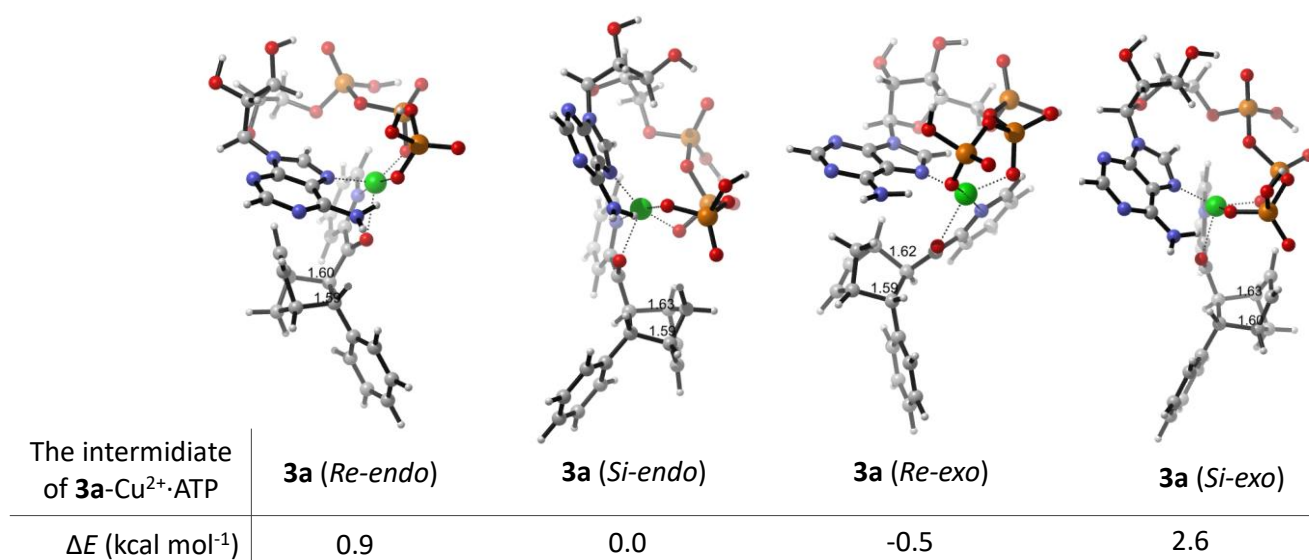

**Supplementary Fig. 24** The intermediates of **3a**-Cu<sup>2+</sup>·ATP and their relative electronic energies ( $\Delta E$ ).

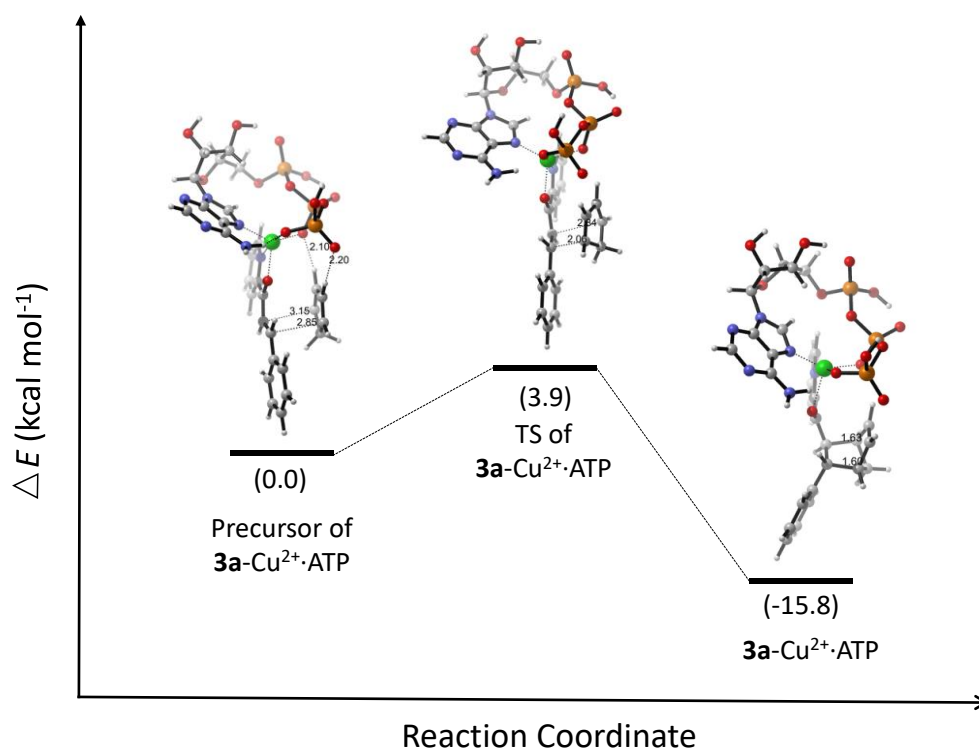

**Supplementary Fig. 25** The relative electronic energy profile of the reaction path for Cu<sup>2+</sup>·ATP-catalyzed Diels-Alder reaction of **1a** and **2** that yields **3a** (*endo*) in the absolute configuration of 1*R*, 2*S*, 3*S*, 4*S*. Abbreviation: TS, transition state.

**HPLC analysis.** The enantioselectivity of **3a-h** was determined by a chiral HPLC column (250 × 4.6 mm) with hexane and *i*-PrOH as eluents.

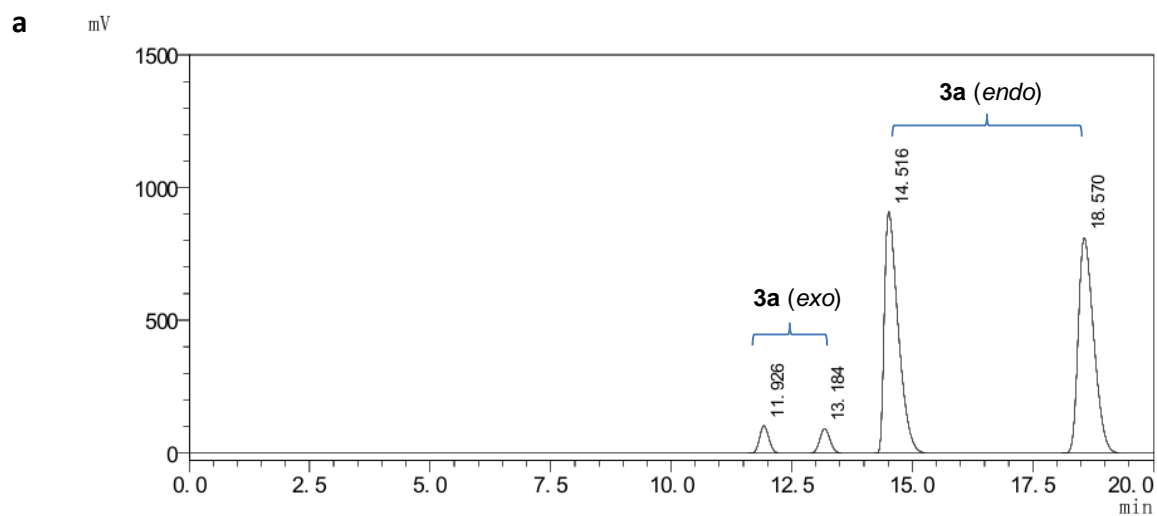

<Peak table>

| Peak# | Ret. Time | Area     | Height | Conc. | Unit | Mark | Name |
|-------|-----------|----------|--------|-------|------|------|------|
| 1     | 11.926    | 1350700  | 102932 | 0.000 |      | M    |      |
| 2     | 13.184    | 1342646  | 91959  | 0.000 |      | M    |      |
| 3     | 14.516    | 18082841 | 909607 | 0.000 |      | M    |      |
| 4     | 18.570    | 18106792 | 811480 | 0.000 |      | M    |      |

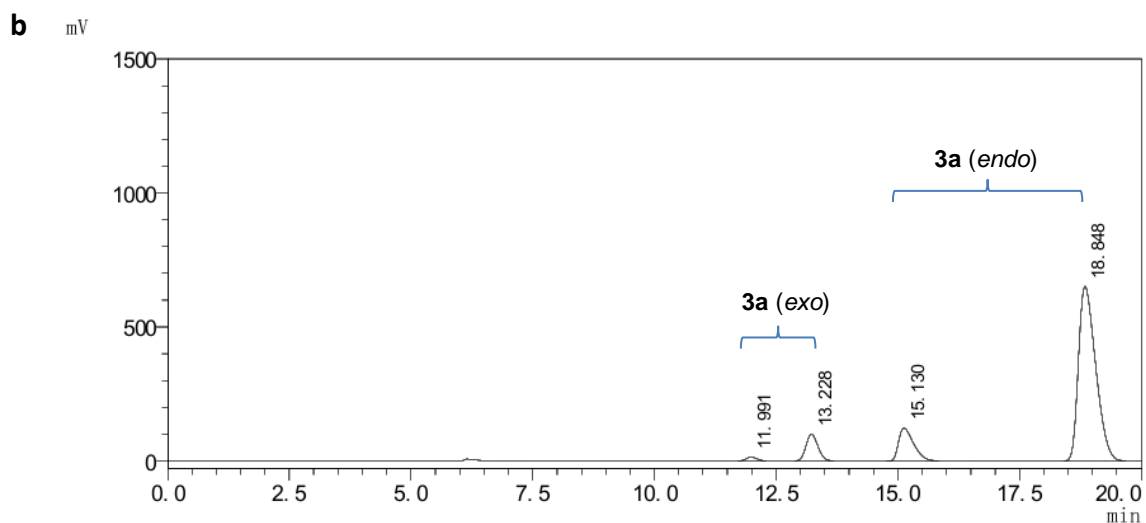

<Peak table>

| Peak# | Ret. Time | Area     | Height | Conc. | Unit | Mark | Name |
|-------|-----------|----------|--------|-------|------|------|------|
| 1     | 11.991    | 197582   | 13485  | 0.000 |      | M    |      |
| 2     | 13.228    | 1691906  | 99167  | 0.000 |      | M    |      |
| 3     | 15.130    | 2615605  | 122022 | 0.000 |      | M    |      |
| 4     | 18.848    | 16044452 | 651347 | 0.000 |      | M    |      |

**Supplementary Fig. 26 a** HPLC trace of racemic **3a**. **b** HPLC trace of product **3a** that from the Diels-Alder reaction catalyzed by Cu<sup>2+</sup>-ATP for the *exo* isomer of 79% ee and the *endo* isomer of 72% ee. HPLC condition: Daicel Chiralpak ODH column, hexane/*i*-PrOH 98:2, 0.5 mL min<sup>-1</sup>, 254 nm, 25 °C.

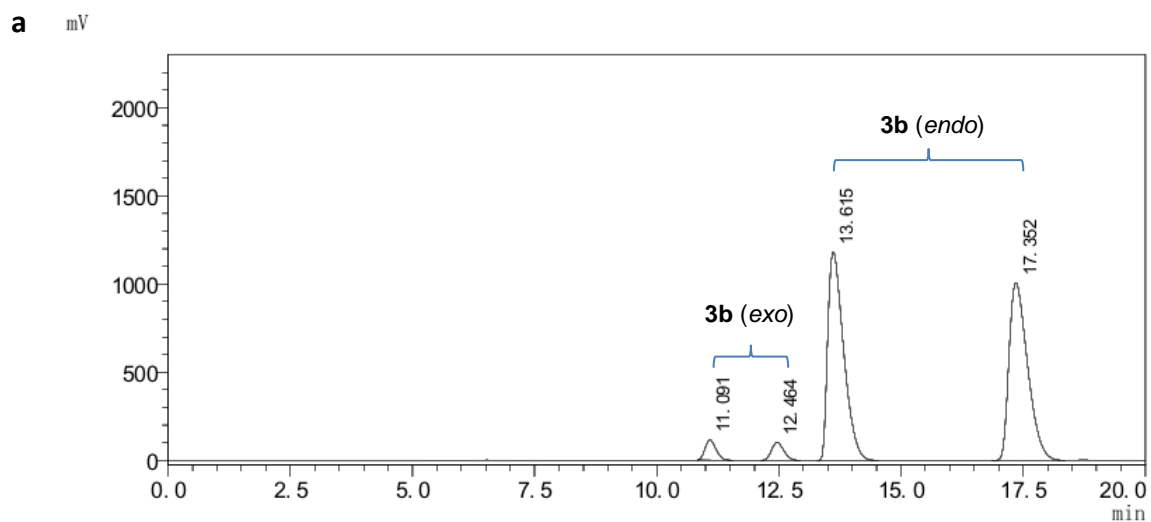

<Peak table>

| Peak# | Ret. Time | Area     | Height  | Conc. | Unit | Mark | Name |
|-------|-----------|----------|---------|-------|------|------|------|
| 1     | 11.091    | 1780210  | 113474  | 0.000 |      | M    |      |
| 2     | 12.464    | 1809308  | 101959  | 0.000 |      | M    |      |
| 3     | 13.615    | 26721126 | 1184550 | 0.000 |      | M    |      |
| 4     | 17.352    | 26727757 | 1008109 | 0.000 |      | M    |      |

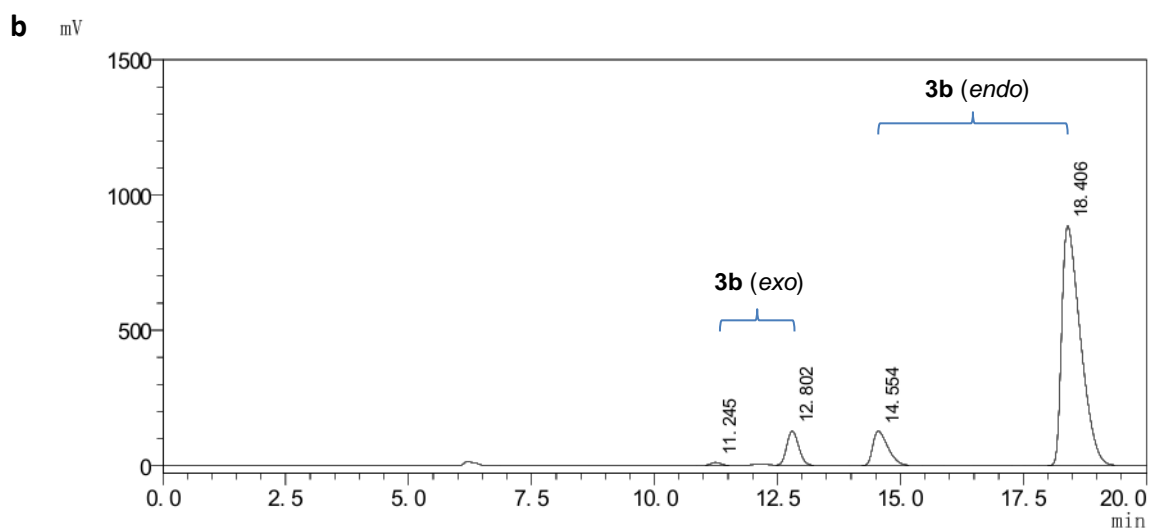

<Peak table>

| Peak# | Ret. Time | Area     | Height | Conc. | Unit | Mark | Name |
|-------|-----------|----------|--------|-------|------|------|------|
| 1     | 11.245    | 136723   | 10191  | 0.000 |      | M    |      |
| 2     | 12.802    | 2111972  | 126052 | 0.000 |      | M    |      |
| 3     | 14.554    | 2652252  | 126124 | 0.000 |      | M    |      |
| 4     | 18.406    | 23358557 | 885340 | 0.000 |      | M    |      |

**Supplementary Fig. 27** **a** HPLC trace of racemic **3b**. **b** HPLC trace of product **3b** from the Diels-Alder reaction catalyzed by Cu<sup>2+</sup>-ATP for the *exo* isomer of 88% ee and the *endo* isomer of 80% ee. HPLC condition: Daicel Chiralpak OD column, hexane/*i*-PrOH 98:2, 0.5 mL min<sup>-1</sup>, 254 nm, 25 °C.

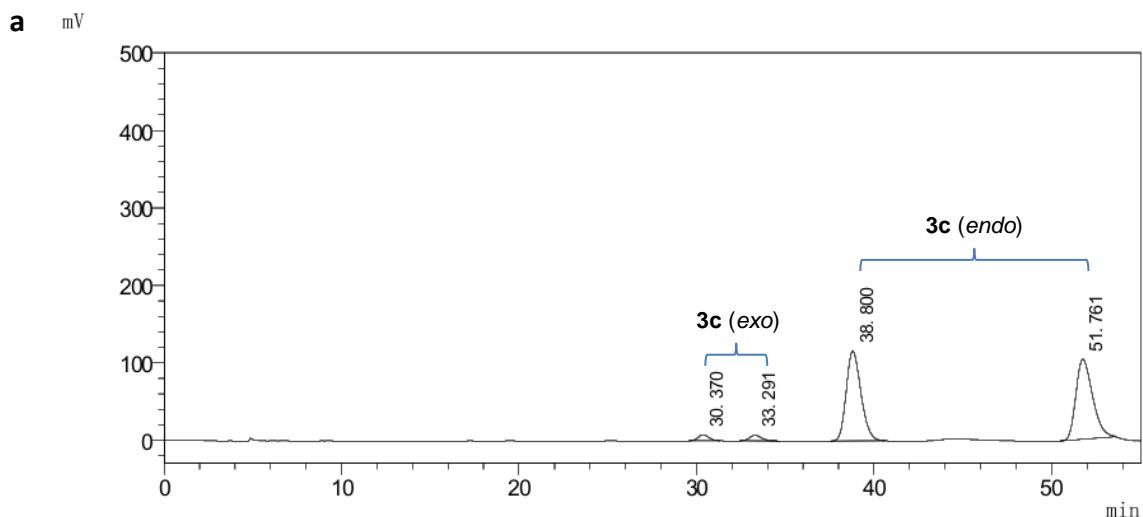

<Peak table>

| Peak# | Ret. Time | Area    | Height | Conc. | Unit | Mark | Name |
|-------|-----------|---------|--------|-------|------|------|------|
| 1     | 30.370    | 326071  | 7867   | 0.000 |      | M    |      |
| 2     | 33.291    | 334338  | 7125   | 0.000 |      | M    |      |
| 3     | 38.800    | 6685877 | 116095 | 0.000 |      | M    |      |
| 4     | 51.761    | 6736538 | 103189 | 0.000 |      | M    |      |

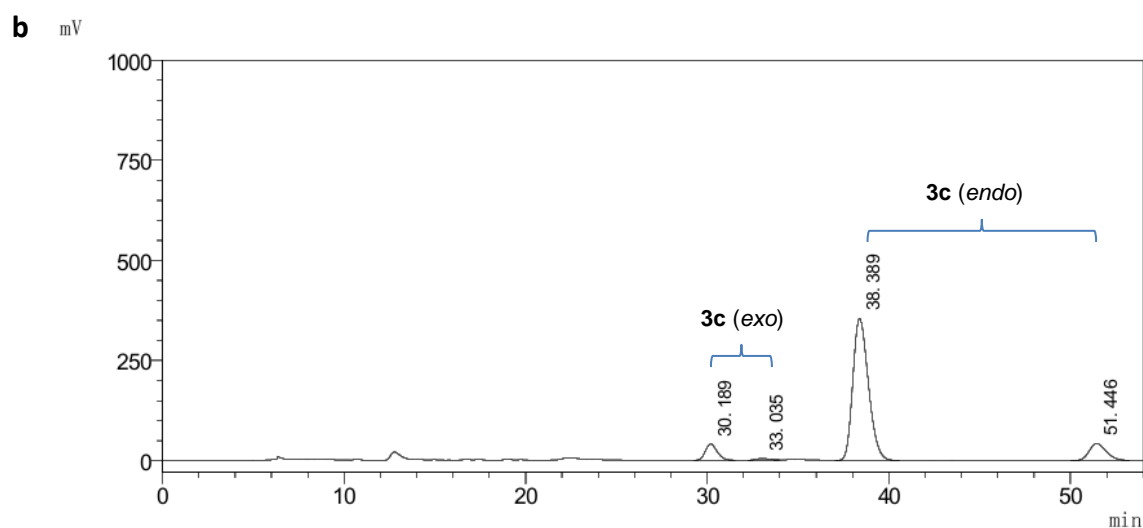

<Peak table>

| Peak# | Ret. Time | Area     | Height | Conc. | Unit | Mark | Name |
|-------|-----------|----------|--------|-------|------|------|------|
| 1     | 30.189    | 1834231  | 40402  | 0.000 |      | M    |      |
| 2     | 33.035    | 199267   | 4213   | 0.000 |      | M    |      |
| 3     | 38.389    | 21151294 | 354664 | 0.000 |      | M    |      |
| 4     | 51.446    | 2745824  | 41898  | 0.000 |      | M    |      |

**Supplementary Fig. 28 a** HPLC trace of racemic **3c**. **b** HPLC trace of product **3c** from the Diels-Alder reaction catalyzed by Cu<sup>2+</sup>-ATP for the *exo* isomer of 80% ee and the *endo* isomer of 77% ee. HPLC condition: Daicel Chiralpak AD column, hexane/*i*-PrOH 98:2, 0.5 mL min<sup>-1</sup>, 254 nm, 25 °C.

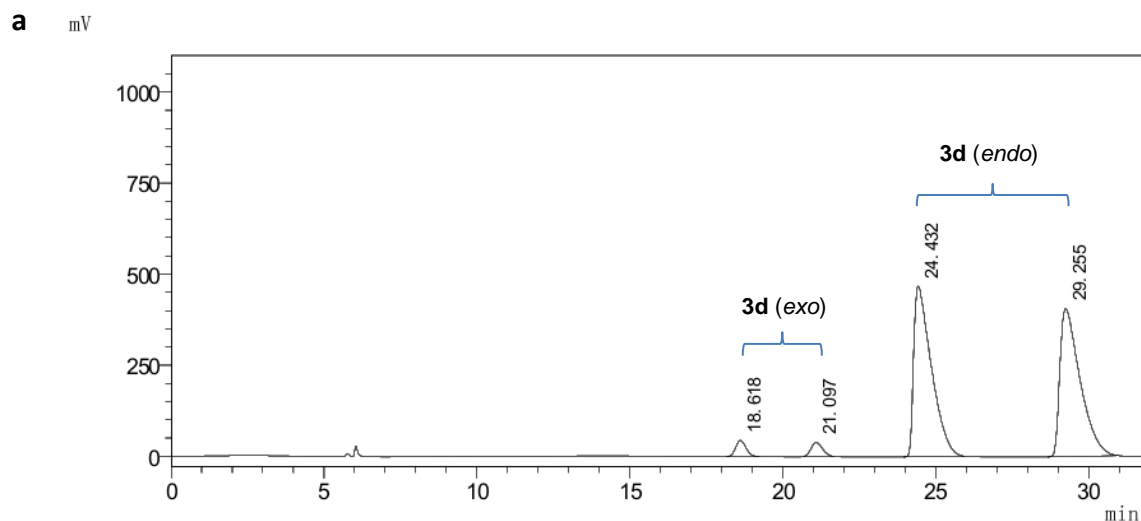

<Peak table>

| Peak# | Ret. Time | Area     | Height | Conc. | Unit | Mark | Name |
|-------|-----------|----------|--------|-------|------|------|------|
| 1     | 18.618    | 1041998  | 44316  | 0.000 |      | M    |      |
| 2     | 21.097    | 983607   | 37988  | 0.000 |      | M    |      |
| 3     | 24.432    | 18842320 | 468209 | 0.000 |      | M    |      |
| 4     | 29.255    | 18676896 | 406218 | 0.000 |      | M    |      |

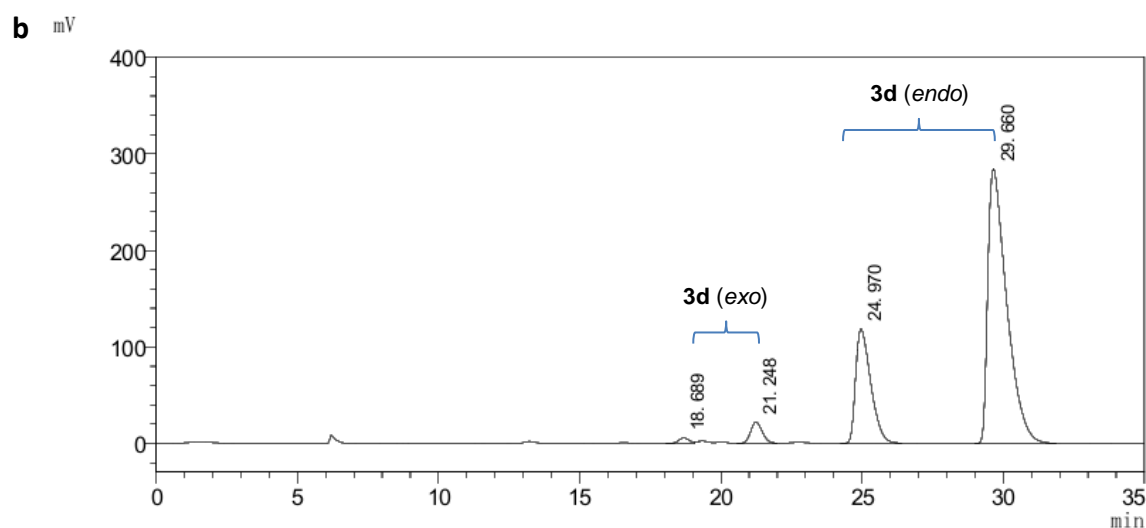

<Peak table>

| Peak# | Ret. Time | Area     | Height | Conc. | Unit | Mark | Name |
|-------|-----------|----------|--------|-------|------|------|------|
| 1     | 18.689    | 144639   | 5613   | 0.000 |      | M    |      |
| 2     | 21.248    | 625606   | 21924  | 0.000 |      | M    |      |
| 3     | 24.970    | 4390140  | 118597 | 0.000 |      | M    |      |
| 4     | 29.660    | 13248237 | 284312 | 0.000 |      | M    |      |

**Supplementary Fig. 29** **a** HPLC trace of racemic **3d**. **b** HPLC trace of product **3d** from the Diels-Alder reaction catalyzed by Cu<sup>2+</sup>·ATP for the *exo* isomer of 62% ee and the *endo* isomer of 50% ee. HPLC condition: Daicel Chiralpak ODH column, hexane/*i*-PrOH 98:2, 0.5 mL min<sup>-1</sup>, 254 nm, 25 °C.

**a** mV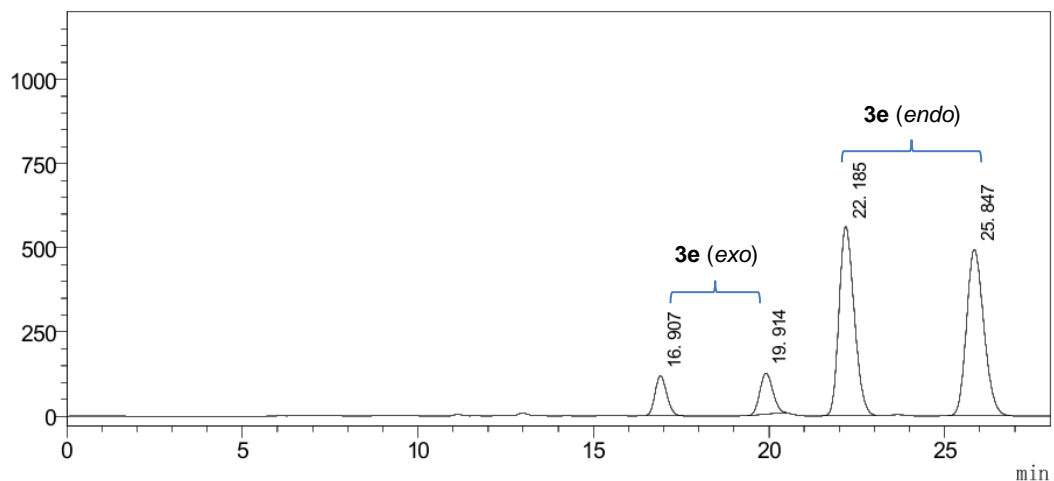

&lt;Peak table&gt;

| Peak# | Ret. Time | Area     | Height | Conc. | Unit | Mark | Name |
|-------|-----------|----------|--------|-------|------|------|------|
| 1     | 16.907    | 2717591  | 117947 | 0.000 |      | M    |      |
| 2     | 19.914    | 3118196  | 121946 | 0.000 |      | M    |      |
| 3     | 22.185    | 16864839 | 561311 | 0.000 |      | M    |      |
| 4     | 25.847    | 16970924 | 494182 | 0.000 |      | M    |      |

**b**

mV

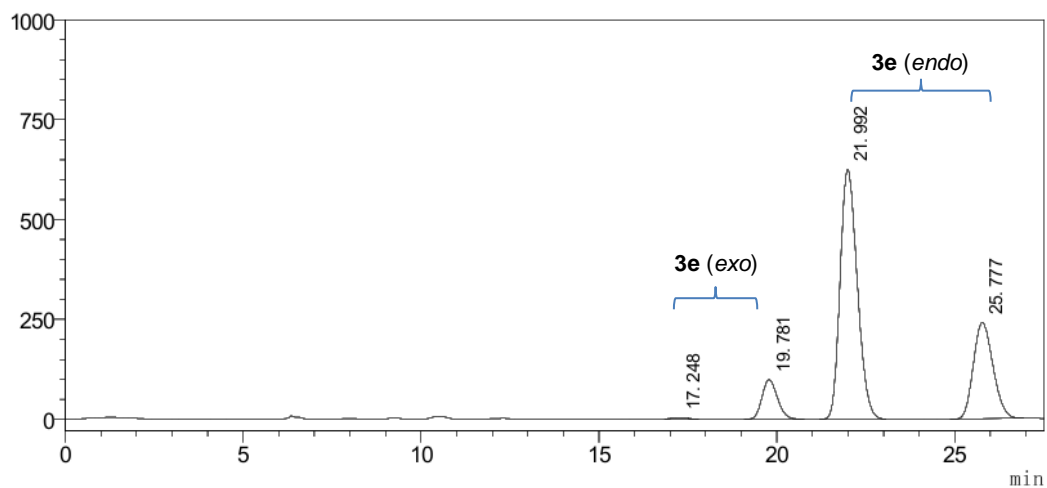

&lt;Peak table&gt;

| Peak# | Ret. Time | Area     | Height | Conc. | Unit | Mark | Name |
|-------|-----------|----------|--------|-------|------|------|------|
| 1     | 17.248    | 108089   | 4005   | 0.000 |      | M    |      |
| 2     | 19.781    | 2974872  | 98890  | 0.000 |      | M    |      |
| 3     | 21.992    | 20989034 | 625065 | 0.000 |      | M    |      |
| 4     | 25.777    | 9242805  | 241024 | 0.000 |      | M    |      |

**Supplementary Fig. 30 a** HPLC trace of racemic **3e**. **b** HPLC trace of product **3e** from the Diels-Alder reaction catalyzed by Cu<sup>2+</sup>-ATP for the *exo* isomer of 93% ee and the *endo* isomer of 39% ee. HPLC condition: Daicel Chiralpak AD column, hexane/*i*-PrOH 98:2, 0.5 mL min<sup>-1</sup>, 254 nm, 25 °C.

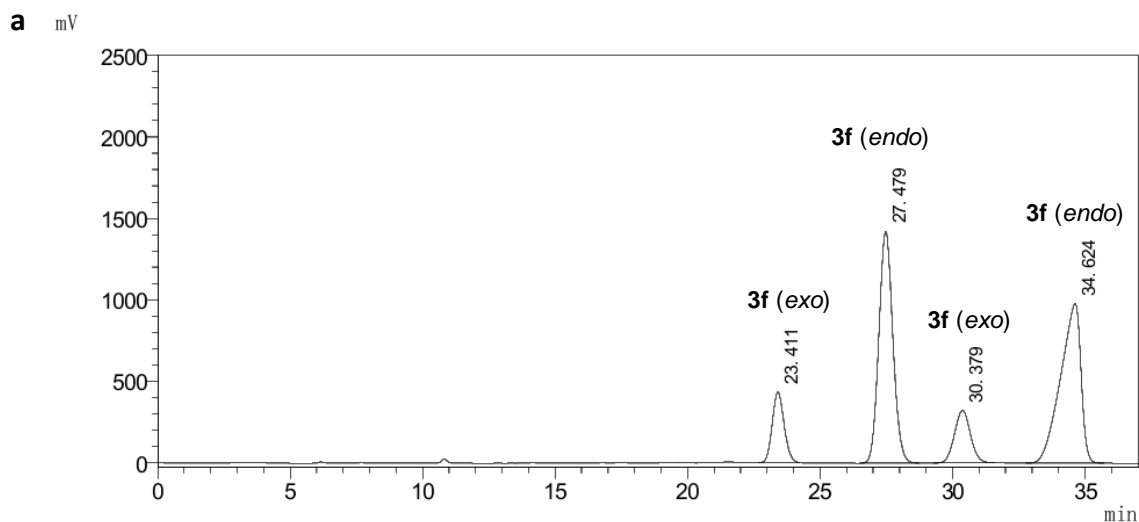

<Peak table>

| Peak# | Ret. Time | Area     | Height  | Conc. | Unit | Mark | Name |
|-------|-----------|----------|---------|-------|------|------|------|
| 1     | 23.411    | 13518019 | 434013  | 0.000 |      | M    |      |
| 2     | 27.479    | 52426923 | 1422579 | 0.000 |      | M    |      |
| 3     | 30.379    | 13449763 | 322863  | 0.000 |      | M    |      |
| 4     | 34.624    | 52636351 | 980594  | 0.000 |      | M    |      |

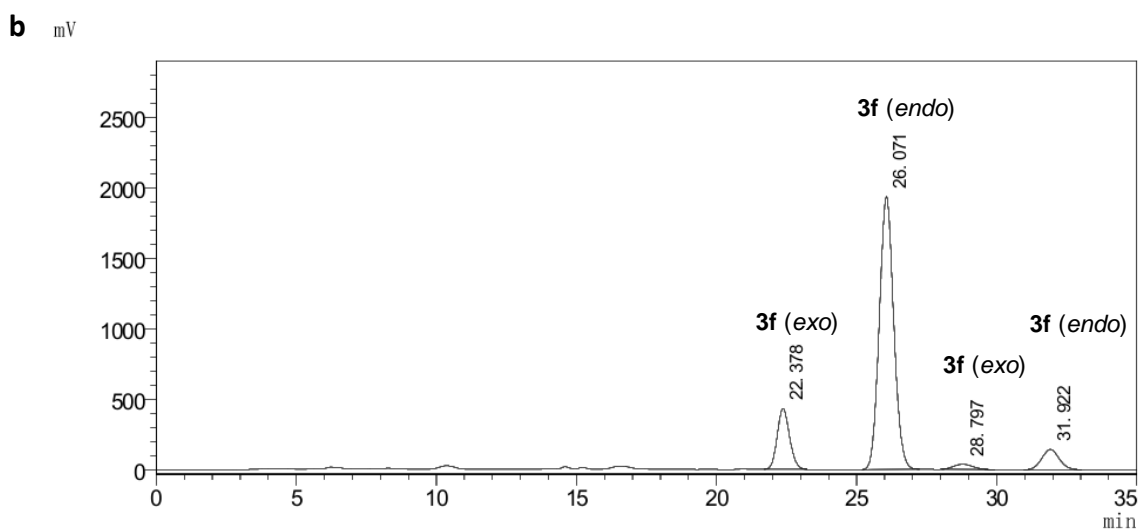

<Peak table>

| Peak# | Ret. Time | Area     | Height  | Conc. | Unit | Mark | Name |
|-------|-----------|----------|---------|-------|------|------|------|
| 1     | 22.378    | 13188348 | 430200  | 0.000 |      | M    |      |
| 2     | 26.071    | 69324282 | 1934707 | 0.000 |      | M    |      |
| 3     | 28.797    | 1778547  | 36686   | 0.000 |      | M    |      |
| 4     | 31.922    | 6221126  | 143456  | 0.000 |      | M    |      |

**Supplementary Fig. 31** **a** HPLC trace of racemic **3f**. **b** HPLC trace of product **3f** from the Diels-Alder reaction catalyzed by Cu<sup>2+</sup>-ATP for the *exo* isomer of 76% ee and the *endo* isomer of 84% ee. HPLC condition: Daicel Chiralpak AD column, hexane/*i*-PrOH 90:10, 0.5 mL min<sup>-1</sup>, 254 nm, 25 °C.



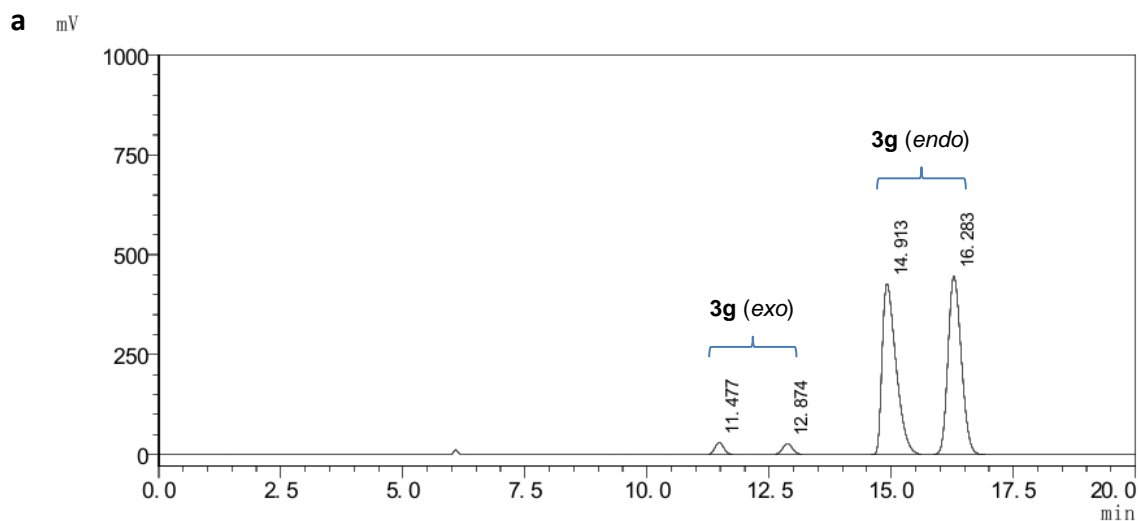

<Peak table>

| Peak# | Ret. Time | Area    | Height | Conc. | Unit | Mark | Name |
|-------|-----------|---------|--------|-------|------|------|------|
| 1     | 11.477    | 364209  | 29507  | 0.000 |      | M    |      |
| 2     | 12.874    | 360856  | 26032  | 0.000 |      | M    |      |
| 3     | 14.913    | 8462127 | 427237 | 0.000 |      | M    |      |
| 4     | 16.283    | 8474746 | 446715 | 0.000 |      | M    |      |

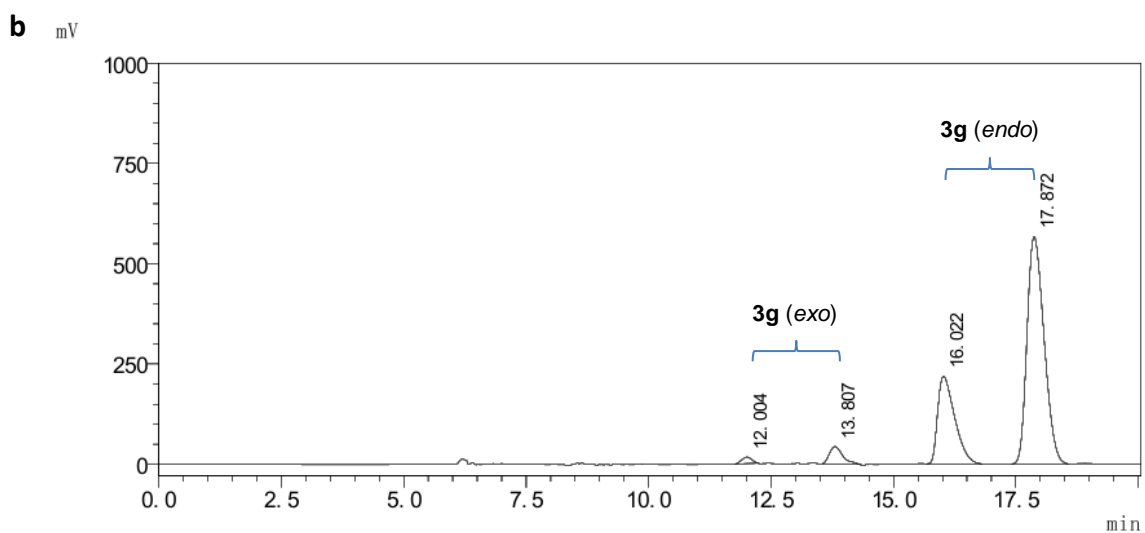

<Peak table>

| Peak# | Ret. Time | Area     | Height | Conc. | Unit | Mark | Name |
|-------|-----------|----------|--------|-------|------|------|------|
| 1     | 12.004    | 237771   | 16378  | 0.000 |      | M    |      |
| 2     | 13.807    | 837634   | 43784  | 0.000 |      | M    |      |
| 3     | 16.022    | 5279941  | 218188 | 0.000 |      | M    |      |
| 4     | 17.872    | 13678379 | 566640 | 0.000 |      | M    |      |

**Supplementary Fig. 32 a** HPLC trace of racemic **3g**. **b** HPLC trace of product **3g** from the Diels-Alder reaction catalyzed by Cu<sup>2+</sup>-ATP for the *exo* isomer of 56% ee and the *endo* isomer of 44% ee. HPLC condition: Daicel Chiralpak ODH column, hexane/*i*-PrOH 98:2, 0.5 mL min<sup>-1</sup>, 254 nm, 25 °C.

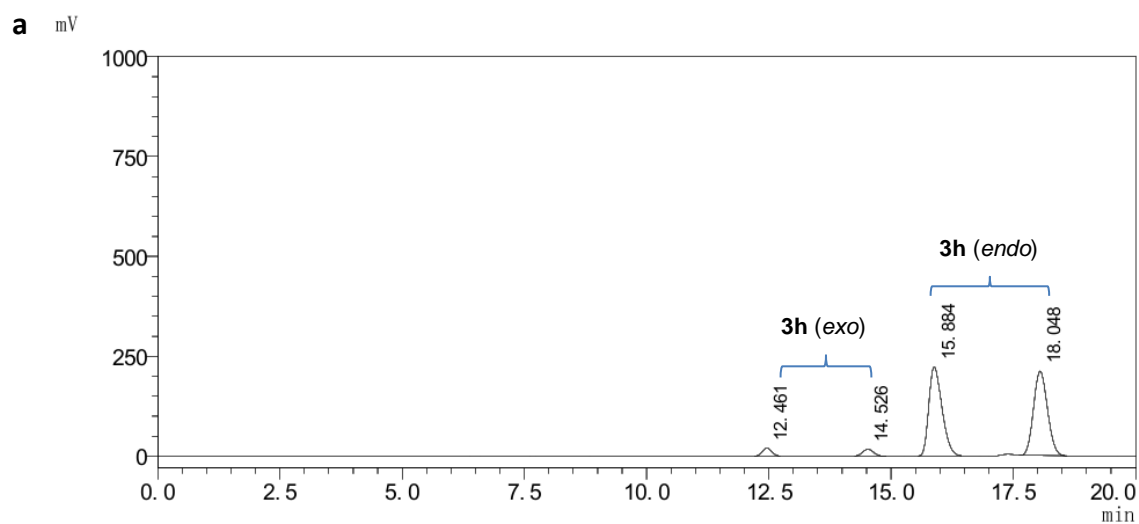

<Peak table>

| Peak# | Ret. Time | Area    | Height | Conc. | Unit | Mark | Name |
|-------|-----------|---------|--------|-------|------|------|------|
| 1     | 12.461    | 258100  | 19771  | 0.000 |      | M    |      |
| 2     | 14.526    | 261632  | 17065  | 0.000 |      | M    |      |
| 3     | 15.884    | 4149071 | 222725 | 0.000 |      | M    |      |
| 4     | 18.048    | 4169960 | 211255 | 0.000 |      | M    |      |

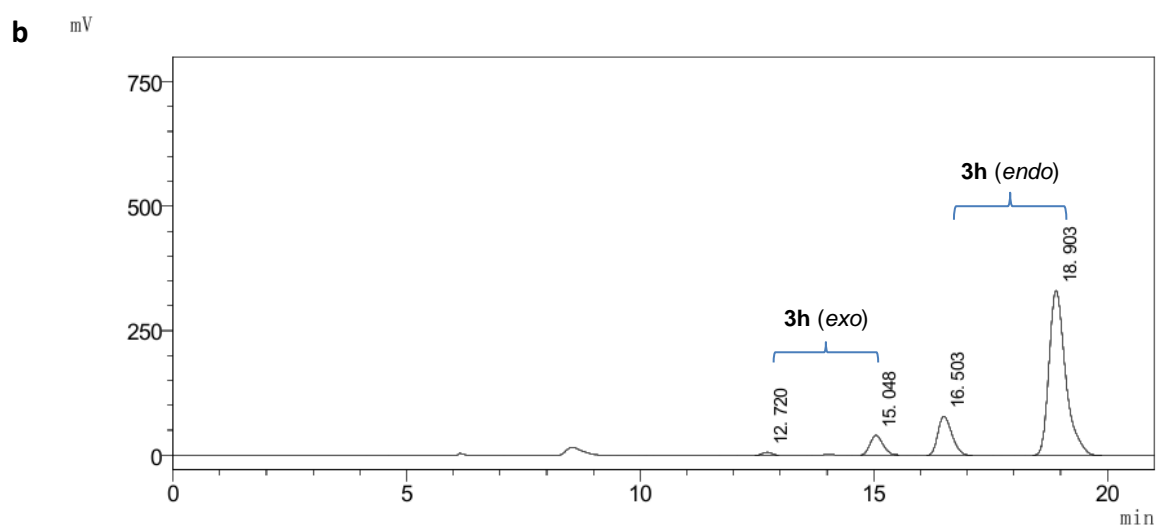

<Peak table>

| Peak# | Ret. Time | Area    | Height | Conc. | Unit | Mark | Name |
|-------|-----------|---------|--------|-------|------|------|------|
| 1     | 12.720    | 82533   | 5867   | 0.000 |      | M    |      |
| 2     | 15.048    | 753665  | 39701  | 0.000 |      | M    |      |
| 3     | 16.503    | 1647025 | 78644  | 0.000 |      | M    |      |
| 4     | 18.903    | 8191361 | 331242 | 0.000 |      | M    |      |

**Supplementary Fig. 33 a** HPLC trace of racemic **3h**. **b** HPLC trace of product **3h** from the Diels-Alder reaction catalyzed by  $\text{Cu}^{2+}$ -ATP for the *exo* isomer of 80% ee and the *endo* isomer of 67% ee. HPLC condition: Daicel Chiralpak ODH column, hexane/*i*-PrOH 98:2, 0.5 mL min<sup>-1</sup>, 254 nm, 25 °C.

## Supplementary References

1. Otto, S., Boccaletti, G. & Engberts, J. A chiral Lewis-acid-catalyzed Diels-Alder reaction. Water-enhanced enantioselectivity. *J. Am. Chem. Soc.* **120**, 4238-4239 (1998).
2. Seelig, B., Keiper, S., Stuhlmann, F. & Jäschke, A. Enantioselective ribozyme catalysis of a bimolecular cycloaddition reaction. *Angew. Chem. Int. Ed.* **39**, 4576-4579 (2000).
3. Roelfes, G. & Feringa, B. L. DNA-based asymmetric catalysis. *Angew. Chem. Int. Ed.* **44**, 3230-3232 (2005).
4. Roelfes, G., Boersma, A. J. & Feringa, B. L. Highly enantioselective DNA-based catalysis. *Chem. Commun.*, 635-637 (2006).
5. Reetz, M. T. & Jiao, N. Copper-phthalocyanine conjugates of serum albumins as enantioselective catalysts in Diels-Alder reactions. *Angew. Chem. Int. Ed.* **45**, 2416-2419 (2006).
6. Coquiere, D., Bos, J., Beld, J. & Roelfes, G. Enantioselective artificial metalloenzymes based on a bovine pancreatic polypeptide scaffold. *Angew. Chem. Int. Ed.* **48**, 5159-5162 (2009).
7. Podtetenieff, J., Taglieber, A., Bill, E., Reijerse, E. J. & Reetz, M. T. An artificial metalloenzyme: creation of a designed copper binding site in a thermostable protein. *Angew. Chem. Int. Ed.* **49**, 5151-5155 (2010).
8. Roe, S., Ritson, D. J., Garner, T., Searle, M. & Moses, J. E. Tuneable DNA-based asymmetric catalysis using a G-quadruplex supramolecular assembly. *Chem. Commun.* **46**, 4309-4311 (2010).
9. Wang, C., *et al.* Enantioselective Diels-Alder reactions with G-quadruplex DNA-based catalysts. *Angew. Chem. Int. Ed.* **51**, 9352-9355 (2012).
10. Bos, J., Fusetti, F., Driessen, A. J. M. & Roelfes, G. Enantioselective artificial metalloenzymes by creation of a novel active site at the protein dimer interface. *Angew. Chem. Int. Ed.* **51**, 7472-7475 (2012).
11. Deuss, P. J., Popa, G., Slawin, A. M. Z., Laan, W. & Kamer, P. C. J. Artificial copper enzymes for asymmetric Diels-Alder reactions. *ChemCatChem* **5**, 1184-1191 (2013).
12. Wilking, M. & Hennecke, U. The influence of G-quadruplex structure on DNA-based asymmetric catalysis using the G-quadruplex-bound cationic porphyrin TMPyP4 center dot Cu. *Org. Biomol. Chem.* **11**, 6940-6945 (2013).
13. Zheng, L., Marcozzi, A., Gerasimov, J. Y. & Herrmann, A. Conformationally constrained cyclic peptides: powerful scaffolds for asymmetric catalysis. *Angew. Chem. Int. Ed.* **53**, 7599-7603 (2014).
14. Zheng, L., *et al.* Turning cucurbit 8 uril into a supramolecular nanoreactor for asymmetric catalysis. *Angew. Chem. Int. Ed.* **54**, 13007-13011 (2015).
15. Filice, M., *et al.* Synthesis of a heterogeneous artificial metalloenzyme with chimeric catalytic activity. *Chem. Commun.* **51**, 9324-9327 (2015).
16. Li, Y., *et al.* Terpyridine-Cu(II) targeting human telomeric DNA to produce highly stereospecific G-quadruplex DNA metalloenzyme. *Chem. Sci.* **6**, 5578-5585 (2015).
17. Himiyama, T., *et al.* Construction of a hybrid biocatalyst containing a covalently-linked terpyridine metal complex within a cavity of aponitrobindin. *J. Inorg. Biochem.* **158**, 55-61 (2016).
18. Osseili, H., *et al.* Artificial Diels-Alderase based on the transmembrane protein FhuA. *Beilstein J. Org. Chem.* **12**, 1314-1321 (2016).
19. Ghattas, W., *et al.* Artificial metalloenzymes with the neocarzinostatin scaffold: toward a biocatalyst for the Diels-Alder reaction. *ChemBioChem* **17**, 433-440 (2016).
20. Xu, X., *et al.* Enantioselective Diels-Alder reactions using a G-triplex DNA-based catalyst. *Catal. Commun.* **74**, 16-18 (2016).
21. Marek, J. J., Singh, R. P., Heuer, A. & Hennecke, U. Enantioselective catalysis by using short, structurally defined DNA hairpins as scaffold for hybrid catalysts. *Chem. Eur. J.* **23**, 6004-6008 (2017).
22. Himiyama, T., Taniguchi, N., Kato, S., Onoda, A. & Hayashi, T. A pyrene-linked cavity within a beta-barrel protein promotes an asymmetric Diels-Alder reaction. *Angew. Chem. Int. Ed.* **56**, 13618-13622 (2017).
23. Di Meo, T., *et al.* Alpha Rep A3: A versatile artificial scaffold for metalloenzyme design. *Chem. Eur. J.* **23**, 10156-10166 (2017).
24. Marek, J. J. & Hennecke, U. Why DNA is a more effective scaffold than RNA in nucleic acid-based asymmetric catalysis—supramolecular control of cooperative effects. *Chem. Eur. J.* **23**, 6009-6013 (2017).
25. Ghattas, W., *et al.* Receptor-based artificial metalloenzymes on living human cells. *J. Am. Chem. Soc.* **140**, 8756-8762 (2018).
26. Fischer, J., *et al.* Robust and versatile host protein for the design and evaluation of artificial metal centers. *ACS Catal.* **9**, 11371-11380 (2019).
27. Di Meo, T., *et al.* Functionalized artificial bidomain proteins based on an alpha-solenoid protein repeat scaffold: a new class of artificial Diels-Alderases. *ACS Omega* **4**, 4437-4447 (2019).
28. Ghattas, W., *et al.* Cu-II-containing 1-aminocyclopropane carboxylic acid oxidase is an efficient stereospecific Diels-Alderase. *Angew. Chem. Int. Ed.* **58**, 14605-14609 (2019).
29. Qi, Q., *et al.* An efficient cyclic di-AMP based artificial metalloribozyme for enantioselective Diels-Alder reactions. *Eur. J. Org. Chem.* **2020**, 4417-4424 (2020).
30. Otto, S., Bertocin, F. & Engberts, J. Lewis acid catalysis of a Diels-Alder reaction in water. *J. Am. Chem. Soc.* **118**, 7702-7707 (1996).
31. Wolfe, A., Shimer, G. H., Jr. & Meehan, T. Polycyclic aromatic hydrocarbons physically intercalate into duplex regions of denatured DNA. *Biochemistry* **26**, 6392-6396 (1987).
